# Rho1 activation recapitulates early gastrulation events in the ventral, but not dorsal, epithelium of *Drosophila* embryos

Ashley Rich<sup>1</sup>, Richard G. Fehon<sup>1</sup>, Michael Glotzer<sup>1\*</sup>

\*For correspondence:

[mglotzer@uchicago.edu](mailto:mglotzer@uchicago.edu) (MG)

<sup>1</sup>Department of Molecular Genetics and Cell Biology, University of Chicago, Chicago, IL 60637, USA

**Abstract** Ventral furrow formation, the first step in *Drosophila* gastrulation, is a well-studied example of tissue morphogenesis. Rho1 is highly active in a subset of ventral cells and is required for this morphogenetic event. However, it is unclear whether spatially patterned Rho1 activity alone is sufficient to recapitulate all aspects of this morphogenetic event, including anisotropic apical constriction and coordinated cell movements. Here, using an optogenetic probe that rapidly and robustly activates Rho1 in *Drosophila* tissues, we show that Rho1 activity induces ectopic deformations in the dorsal and ventral epithelia of *Drosophila* embryos. These perturbations reveal substantial differences in how ventral and dorsal cells, both within and outside the zone of Rho1 activation, respond to spatially and temporally identical patterns of Rho1 activation. Our results demonstrate that an asymmetric zone of Rho1 activity is not sufficient to recapitulate ventral furrow formation and indicate that additional, ventral-specific factors contribute to the cell- and tissue-level behaviors that emerge during ventral furrow formation.

## Introduction

Tissue morphogenesis underlies the development of multicellular organisms. The molecular and cellular mechanisms that govern tissue morphogenesis remain a central challenge in developmental cell biology. Extensive genetic and biochemical experiments have defined the factors required for many morphogenetic movements. Furthermore, methods for imaging and quantitatively describing cell shape changes are ever-improving. Despite this progress, questions remain. For example, how pliable are tissues before and while they are deforming? To what degree does the underlying cytoskeleton of cells within a tissue limit their ability to deform, and to what degree are shape changes of neighboring cells coordinated?

Ventral furrow formation in the *Drosophila* embryo is one of the best studied examples of tissue morphogenesis; it is the first step in *Drosophila* gastrulation. Ventral furrow formation occurs when a rectangular zone of approximately 1000 cells, arranged in 18 rows, on the ventral surface of the embryonic epithelium apically constrict and invaginate into the embryo, ultimately giving rise to the embryonic mesoderm (*Leptin and Grunewald, 1990; Sweeton et al., 1991*). Many molecules required for ventral furrow formation have been identified: An extracellular serine protease cascade activates the transcription factor Dorsal which drives the expression of two additional transcription factors, Snail and Twist, in a subset of ventral cells, inducing them to adopt mesodermal fates (*Morisato and Anderson, 1995; Ip et al., 1992; Jiang et al., 1991*). Snail and Twist then induce the

40 expression of secreted and cell surface molecules, including the ligand Fog, the G-protein-coupled  
41 receptor (GPCR) Mist, and the transmembrane protein T48 (*Dawes-Hoang et al., 2005; Costa et al.,*  
42 *1994; Kölsch et al., 2007; Manning et al., 2013*). Together with Concertina, a maternally contributed  
43 G $\alpha$  protein, and Smog, a maternally contributed GPCR, these factors recruit and activate RhoGEF2,  
44 a Rho1-specific guanine nucleotide exchange factor, at the apical membrane of ventral cells (*Parks*  
45 *and Wieschaus, 1991; Kölsch et al., 2007; Nikolaidou and Barrett, 2004; Kerridge et al., 2016*).  
46 RhoGEF2 then activates Rho1 to assemble a contractile actomyosin network (*Fox and Peifer, 2007*);  
47 these networks within single cells are coupled through adherens junctions between neighboring  
48 cells into a supracellular actomyosin network that promotes apical constriction and robust ventral  
49 furrow formation (*Martin et al., 2010; Yevick et al., 2019*). Notably, both RhoGEF2 accumulation  
50 and Rho1 activation are pulsatile (*Martin et al., 2010; Mason et al., 2016*).

51 The intracellular signaling cascade described above activates Rho1 within individual presumptive  
52 mesoderm cells. This could, in principle, account for ventral furrow formation (*Gilmour et al., 2017;*  
53 *Ko and Martin, 2020*). However, several features of the ventral furrow suggest that ventral cells  
54 exhibit a high degree of intercellular coupling, which may influence the outcome of the genetically  
55 encoded contractility. For example, the cells in the ventral furrow constrict their apices more along  
56 the dorsal-ventral axis of the embryo than along the anterior-posterior axis (*Sweeton et al., 1991;*  
57 *Martin et al., 2010*). If individual ventral cells constrict and invaginate without being influenced by  
58 their neighbors, one would predict isotropic apical constriction. Additionally, the apical constriction  
59 of individual cells appears coordinated, with cells adjacent to constricting cells more likely to  
60 constrict than their more distant counterparts (*Sweeton et al., 1991; Gao et al., 2016*). Furthermore,  
61 multiple rows of cells lateral to the furrow bend towards it, indicating that forces are transmitted  
62 over long distances in the ventral epithelium (*Rauzi et al., 2015; Costa et al., 1994; Leptin et al.,*  
63 *1992*).

64 Taken together, this wealth of previous results suggests that ventral furrow formation results  
65 from a combination of intracellular Rho1-mediated contractility and intercellular coupling of those  
66 contractile forces. In the simplest iteration of this model, an asymmetric zone of Rho1 activation  
67 is sufficient to recapitulate both the intra- and intercellular aspects of ventral furrow formation  
68 (*Dobrovinski et al., 2018*). Indeed, it was recently shown that an asymmetric zone of local Rho1 ac-  
69 tivation is sufficient to induce an ectopic invagination in the dorsal *Drosophila* epithelium (*Izquierdo*  
70 *et al., 2018*). However, it remains unclear whether local Rho1 activation alone is sufficient to induce  
71 sustained tissue morphogenesis and recapitulate all aspects of ventral furrow formation, or whether  
72 furrows in wildtype embryos result from a local zone of contractility modulated by ventral-specific  
73 gene expression.

74 Addressing these and related questions necessitates the ability to activate Rho1 with high spatial  
75 and temporal precision without otherwise perturbing the embryo. Optogenetic techniques utilize  
76 photosensitive proteins to control protein localization and/or activity with light; these techniques  
77 are, therefore, well-suited to interrogate the basis for the anisotropic and coordinated nature of  
78 apical constriction during ventral furrow formation. Importantly, the ideal optogenetic approach  
79 will activate Rho1 in response to light alone.

80 Here, we use a LOV-domain based optogenetic probe to acutely activate Rho1 in *Drosophila*.  
81 We demonstrate that this system expresses ubiquitously throughout *Drosophila* development  
82 and is well tolerated. Optogenetic activation of Rho1 induces ectopic deformations in both the  
83 dorsal and ventral embryonic epithelium at the onset of gastrulation. We find that ventral cells  
84 specifically respond to ectopic Rho1 activation with aligned, anisotropic apical constriction. This  
85 ventral-specific response requires Dorsal and Twist expression. Furthermore, we provide evidence  
86 that the transmission of contractile forces over long distances is specific to the ventral epithelium.

## 87 Results

### 88 A LOV domain-based optogenetic system controls Rho1 activity in *Drosophila*

89 To study the cellular consequences of acute Rho1 activation and probe the impact of Rho1 activation  
90 on cells neighboring the activation region, we adapted an optogenetic system for use in *Drosophila*.  
91 This two-component system consists of a membrane tethered LOV domain fused to the SsrA  
92 peptide and a cytoplasmic SspB protein fused to a protein of interest (**Figure 1a**) (*Guntas et al.,*  
93 **2015**; *Strickland et al., 2012*). Blue light exposure induces a conformational change in the LOV  
94 domain, exposing the SsrA peptide and recruiting the SspB fusion protein to the plasma membrane  
95 (**Figure 1a**). As a proof of concept, we first expressed the membrane localized LOV domain and  
96 an SspB-mScarlet fusion from the ubiquitin promoter. Local activation of a region of the dorsal  
97 embryonic epithelium with blue light induces rapid recruitment of SspB-mScarlet to the plasma  
98 membrane (**Figure 1b**). SspB-mScarlet remains associated with the plasma membrane as long  
99 as blue light activation is sustained but rapidly (~1 min) returns to its dark state, cytoplasmic  
100 localization, upon cessation of photoactivation (**Figure 1b**).

101 To control Rho1 activation, we replaced mScarlet with the catalytic Dbl homology (DH) domain  
102 of LARG to generate photo-recruitable SspB-GFP-LARG(DH) (hereafter called PR-GEF) (**Figure 1c**).  
103 LARG is a human RhoA-specific GEF; the DH domain of LARG has previously been used in a  
104 related optogenetic system to control RhoA activity in mammalian tissue culture cells (*Wagner*  
105 *and Glotzer, 2016*). We used the DH domain of LARG alone to ensure that the recruitable GEF's  
106 function is divorced from all endogenous regulation and only sensitive to optogenetic activation.  
107 Homozygous flies expressing the membrane localized LOV-SsrA and PR-GEF from the ubiquitin  
108 promoter are viable and fertile, indicating that these transgenes are well tolerated. Global activation  
109 of the dorsal embryonic epithelium with blue light induces strong recruitment of PR-GEF to the  
110 plasma membrane within seconds, and this global PR-GEF recruitment induces cortical myosin  
111 accumulation within 1 minute (**Figure 1d**). Myosin accumulates both medially and junctionally  
112 (**Figure 1d**). Optogenetically-induced cortical myosin completely disappears within 3 minutes of  
113 cessation of photoactivation (**Figure 1d**). Thus, using conventional instruments, this optogenetic  
114 system rapidly, robustly, and reversibly activates Rho1 in the embryonic epithelium. This system also  
115 activates Rho1 in all *Drosophila* tissues tested, including the pupal notum, follicular epithelium, larval  
116 wing imaginal disc, and larval central nervous system (**Figure 1–Figure Supplement 1**). In the larval  
117 wing peripodial epithelium, optogenetic activation of Rho1 can induce myosin accumulation with  
118 subcellular precision (**Figure 1–Figure Supplement 1c**). Optogenetic activation of Rho1 is sensitive to  
119 light dosage; attenuating the activating light induced less myosin-Ch accumulation, indicating lower  
120 levels of Rho1 activation (**Figure 1–Figure Supplement 2**). Above a certain threshold of activating  
121 light, Rho1 becomes globally activated, despite precisely defined activation regions (**Figure 1–Figure**  
122 **Supplement 2**). Thus, this LOV domain-based optogenetic probe is capable of controlling Rho1  
123 activation with high spatial and temporal resolution. Furthermore, the level of Rho1 activation can  
124 be tuned by modulating light dosage.

125 While this LOV domain-based optogenetic probe recovers to its dark state activity level within  
126 minutes (**Figure 1**), some biological phenomena may require faster recovery kinetics. To increase  
127 the inactivation rate of our optogenetic probe, we introduced a previously identified point mutation,  
128 I427V, into the LOV domain, which increases the rate at which the LOV domain returns to the  
129 dark state (*Christie et al., 2007*). I427V increases the inactivation rate of the optogenetic system in  
130 *Drosophila* S2 cells expressing a membrane localized LOV domain containing this mutation and a  
131 cytoplasmic, recruitable tagRFP-SspB (**Figure 1–Figure Supplement 3a,b**). Increasing the recovery  
132 rate of the LOV domain also decreases the maximum recruitment of tagRFP-SspB (**Figure 1–Figure**  
133 **Supplement 3a,b**), demonstrating the trade off between rapid inactivation and total recruitment.  
134 Global activation of the rapid cycling LOV domain in *Drosophila* larval brains induced robust Rho1  
135 activation, as scored by accumulation of a Rho1 biosensor (**Figure 1–Figure Supplement 3c**); this  
136 Rho1 activity dissipated within a minute of cessation of global optogenetic activation. In contrast,

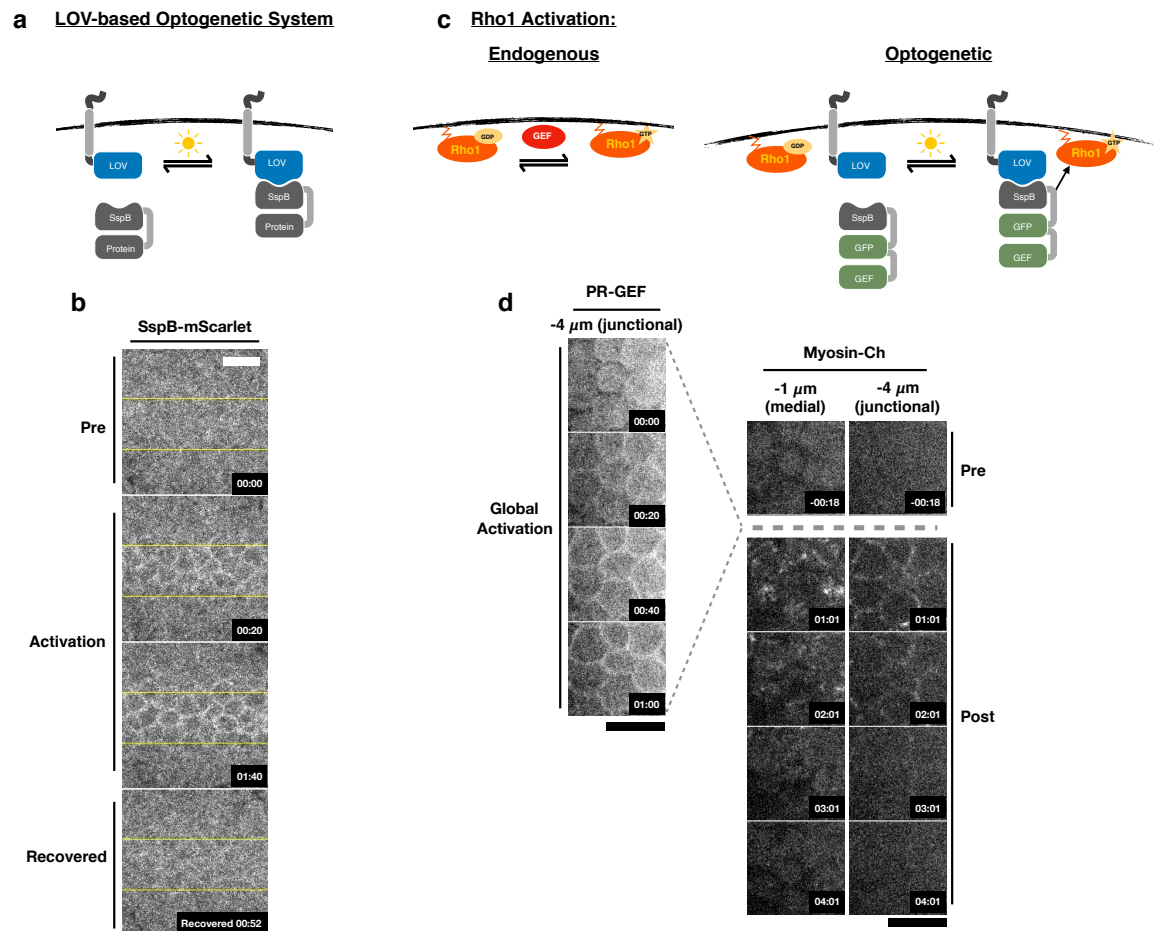

**Figure 1.** Optogenetic control of Rho1 in *Drosophila*.

a) Generic LOV domain-based optogenetic system consisting of a membrane localized LOVSsrA protein and a recruitable SspB protein. SspB can be fused to any protein of interest. Blue light induces a conformational change in the LOV domain, allowing it to recruit SspB fusion proteins to the membrane. b) Dorsal epithelium of an embryo expressing the membrane-localized LOVSsrA and SspB-mScarlet at the onset of gastrulation before, during, and after photo-activation in the indicated region (yellow box). Data representative of 4/4 embryos. c) Optogenetic system for activating Rho1: SspB is fused to GFP and the Dbl homology (DH) domain of LARG (PR-GEF). Photoactivation induces recruitment of the PR-GEF to the membrane and Rho1 activation. d) Dorsal epithelium of an embryo expressing a membrane-localized LOVSsrA and PR-GEF at the onset of gastrulation. The distribution of PR-GEF and myosin are shown before, during, and at the indicated times after global photoactivation. Data representative of 5/5 embryos. Time zero indicates the beginning of photoactivation. Scale bars are 10  $\mu$ m.

**Figure 1-Figure supplement 1.** Recruitment of PR-GEF activates Rho1 in all tissues tested.

**Figure 1-Figure supplement 2.** Ectopic Rho1 activation is sensitive to light dose.

**Figure 1-Figure supplement 3.** Inactivation kinetics of the LOV domain dictate the off rate of optogenetic-induced Rho1 activity.

137 Rho1 remained active a minute after global activation of the wild type LOV domain (**Figure 1–Figure**  
138 **Supplement 3c**). Thus, the cycling kinetics of the LOV domain are the primary determinant of the  
139 off rate of optogenetic-induced Rho1 activity. This emphasizes that there are rapid and robust  
140 mechanisms for shutting off Rho1 activity in vivo; furthermore, it suggests that cells continually  
141 activate Rho1 during cellular and developmental processes that require sustained Rho1 activation.  
142 The wildtype LOV domain is used for the remainder of the experiments presented, as the rapid  
143 recovery was not essential to address the questions answered here.

### 144 **Rho1 activation is sufficient to induce reversible invaginations in the *Drosophila*** 145 **embryonic epithelium**

146 After validating that this system reversibly activates Rho1 in the early *Drosophila* embryo, we asked  
147 whether an asymmetric zone of Rho1 activation is sufficient to induce an ectopic invagination in  
148 the embryonic dorsal epithelium just after cellularization. Ectopic Rho1 activation induces apical  
149 myosin accumulation and is sufficient to induce an ectopic invagination (**Figure 2a**). Importantly, the  
150 size of the invaginated region closely mirrors the size of the photoactivated zone, demonstrating  
151 the spatial precision of this approach and emphasizing that this deformation is light-dependent.  
152 (Rho1 is activated in asymmetric zones of the same dimensions throughout this work, except where  
153 explicitly stated.) This is consistent with recently published work (*Izquierdo et al., 2018*).

154 Local Rho1 activation also induces ectopic invaginations in the ventral embryonic epithelium  
155 prior to the onset of ventral furrowing (**Figure 2b**). The ectopic invaginations induced in either the  
156 dorsal or ventral epithelium recover to their pre-activation state within four minutes of cessation of  
157 optogenetic Rho1 activation (**Figure 2–Figure Supplement 1**). These recovery kinetics are slightly  
158 longer than the cycling kinetics of the WT LOV domain (**Figure 1d, Figure 1–Figure Supplement 3**).  
159 Thus, while ectopic Rho1 activation induces ectopic deformations, the downstream consequences  
160 of optogenetic Rho1 activation are rapidly and robustly inactivated in the absence of continued  
161 photoactivation.

### 162 **Rho1 activation induces distinct apical constriction in the dorsal and ventral ep-** 163 **ithelium**

164 To determine whether dorsal and ventral cells respond similarly to spatially and temporally identical  
165 zones of Rho1 activation, we locally activated Rho1 in the dorsal or ventral epithelium of embryos  
166 expressing the optogenetic components and the membrane marker Gap43-mCh and subsequently  
167 segmented tissues, tracked individual cells, and quantified the area of the apical-most surface  
168 of dorsal or ventral cells before and after optogenetic Rho1 activation (*Aigouy et al., 2010*). We  
169 also quantified the anisotropy of apical constriction by measuring the extent of elongation of the  
170 apical-most surfaces of cells before and after photoactivation (*Aigouy et al., 2010*). Local Rho1  
171 activation in individual cells in the dorsal embryonic epithelium induced apical constriction (**Fig-**  
172 **ure 3a**); optogenetic activation of Rho1 in a collection of dorsal cells also induced apical constriction  
173 (**Figure 3b-c**). Unlike cells of the endogenous ventral furrow, optogenetically activated dorsal cells  
174 constrict isotropically (**Figure 3d-bottom panel, Figure 3–Figure Supplement 4**). Thus, an asymmet-  
175 ric, rectangular zone of Rho1 activation via a LOV-domain based probe is not sufficient to fully  
176 recapitulate the cell shape changes associated with endogenous ventral furrowing. This result  
177 differs from previous work (See Discussion) (*Izquierdo et al., 2018*).

178 We next tested whether optogenetic Rho1 activation has a different effect on ventral cells,  
179 which express ventral-specific genes. We activated ventral cells before they exhibited any overt  
180 signs of apical constriction. Optogenetic activation of Rho1 in a collection of ventral cells also  
181 induced apical constriction within the zone of Rho1 activation (**Figure 3b,c**). However, the apical  
182 surfaces of activated ventral cells were elongated, indicating anisotropic apical constriction. This  
183 anisotropy was strongly aligned with the anterior-posterior axis (**Figure 3d, Figure 3–Figure Supple-**  
184 **ment 4**). A smaller, asymmetric zone of Rho1 activation also induces anisotropic apical constriction  
185 in activated ventral cells but not their non-activated neighbors (**Figure 3–Figure Supplement 3**),

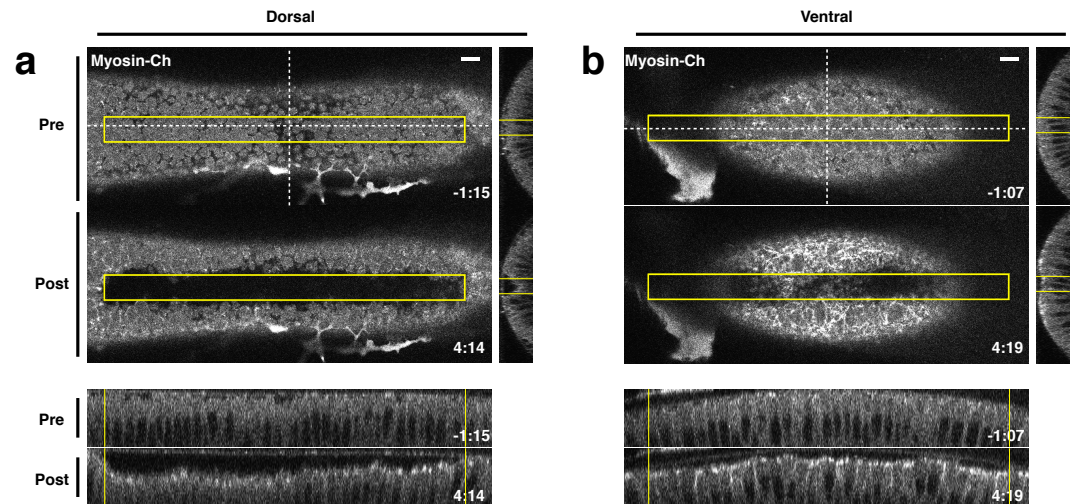

**Figure 2.** Local Rho1 activation is sufficient to induce ectopic invaginations in the embryonic epithelium. a,b) Embryos expressing the optogenetic components and Myosin-Ch at the onset of gastrulation were optogenetically activated in a single apical plane within the yellow box. Ectopic invaginations and Myosin-Ch accumulation are shown in the dorsal (a) and ventral (b) epithelium. Myosin-Ch accumulates both within and outside the region of optogenetic Rho1 activation in the ventral epithelium (b), YZ projection, Right; XZ project, Bottom). This is due to endogenous gastrulation. Data representative of 7/7 (a) and 5/5 (b) embryos. Time zero indicates the first pulse of blue light activation. Scale bars are 10  $\mu$ m.

**Figure 2-Figure supplement 1.** Optogenetic-induced invaginations revert following cessation of Rho1 activation.

186 confirming that our optogenetic experiments induce precocious cell shape changes in the ventral  
187 epithelium. In contrast to the isotropic apical constriction induced in activated cells within the dorsal  
188 epithelium, optogenetic Rho1 activation in cells within the ventral epithelium induces precocious,  
189 anisotropic apical constriction that strongly resemble the anisotropic apical constrictions seen  
190 during endogenous ventral furrow formation (*Figure 3-Figure Supplement 1*).

### 191 Genetic requirements for ventral-specific responses

192 The finding that an asymmetric zone of Rho1 activation induces differential responses in the dorsal  
193 and ventral epithelia suggests that ventral patterning may influence the response to Rho1 activation.  
194 Ventral-specific factors, such as those downstream of Dorsal, Twist, and/or Snail, may cooperate  
195 with an asymmetric zone of Rho1 activation during endogenous ventral furrow formation to drive  
196 strong, anisotropic apical constriction. To test this hypothesis, we locally activated Rho1 in ventral  
197 cells lacking Dorsal protein, a factor required for ventral identity. Optogenetic Rho1 activation in  
198 embryos derived from females homozygous for a null *dorsal* allele still induced apical constriction,  
199 but these apical constrictions were weaker than those of WT ventral cells and were no longer  
200 anisotropic (*Figure 4, Figure 3-Figure Supplement 4*). Indeed, in the absence of the Dorsal protein,  
201 the response of ventral cells to Rho1 activation is similar to the response of wildtype cells in the  
202 dorsal epithelium (*Figure 4b v. Figure 3d-Activated Dorsal, Figure 3-Figure Supplement 4*). Thus,  
203 Dorsal is required to predispose ventral cells to constrict anisotropically along the anterior-posterior  
204 axis of the embryo.

205 The transcription factor Twist is downstream of Dorsal activity in ventral cells. We optogenetically  
206 activated Rho1 in ventral cells of embryos homozygous for a null allele of *twist*. These mutant  
207 cells exhibited apical constriction following ectopic Rho1 activation (*Figure 4a*), but the amount of  
208 constriction, magnitude of anisotropy, and the degree of alignment with the anterior-posterior axis  
209 was less than that of wildtype ventral cells (*Figure 4b v. Figure 3d-Activated Ventral; Figure 3-Figure  
210 Supplement 4*). Thus, Twist promotes the predisposition of ventral cells to constrict anisotropically

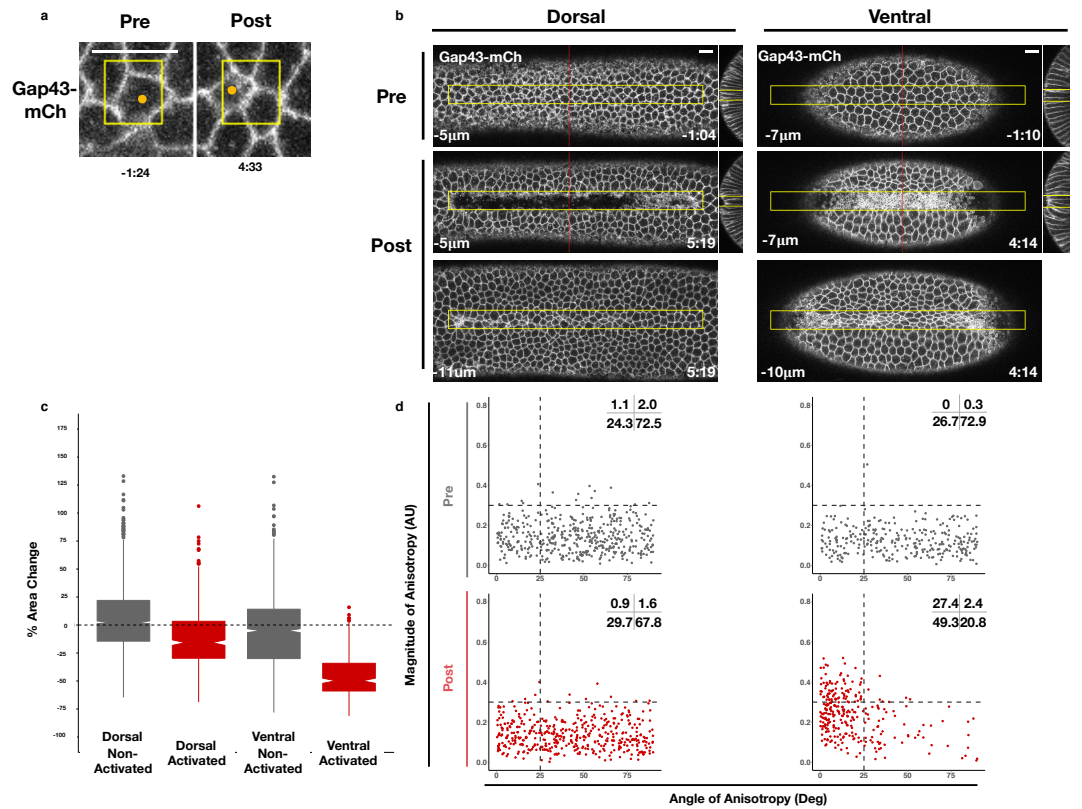

**Figure 3.** Rho1 activation induces distinct apical constriction in dorsal and ventral epithelial cells.

a) Dorsal cells from an embryo expressing the optogenetic components and Gap43-mCh at the onset of gastrulation before and after photoactivation within the yellow box. Z-slices shown represent the apical-most view of the activated cell (orange dot). Data representative of 7/8 cells from 2 embryos. b) Dorsal (left) and ventral (right) epithelium of embryos expressing the optogenetic components and Gap43-mCh at the onset of gastrulation. Rho1 was activated in the yellow box. Images shown in bottom panels were chosen to show the apical surfaces of activated cells. Red lines in (b) indicate position of each YZ slice. Data are representative of 4/4 (a) and 4/4 (b) embryos. Time zero indicates the first pulse of blue light activation. Scale bars are 10 µm. c) Quantification of apical area change induced by optogenetic Rho1 activation. Gray columns represent non-activated cells (cells outside the yellow box in (b)). Red columns represent activated cells (cells within the yellow box in (b)). d) Anisotropy scatter plots: Each dot represents an activated dorsal (left) or ventral (right) cell before (top) or after (bottom) optogenetic activation of Rho1. The magnitude of anisotropy is plotted on the y-axis; the orientation of anisotropy, relative to the anterior-posterior axis of the embryo, is plotted on the x-axis. Dotted lines are provided to facilitate comparisons. Insets show percentage of cells in each quadrant. Cells in the upper left quadrant exhibit highly aligned, anisotropic apical constriction. 444 dorsal cells from 4 embryos and 288 ventral cells from 4 embryos were analyzed. See **Figure 3-Figure Supplement 4** for plots of the changes in anisotropy of individual cells.

**Figure 3-Figure supplement 1.** Quantification of endogenous ventral furrow formation.

**Figure 3-Figure supplement 2.** Schematic of data collection and analysis for local activation experiments.

**Figure 3-Figure supplement 3.** Optogenetic activation of Rho1 induces precocious cell shape changes in the ventral epithelium.

**Figure 3-Figure supplement 4.** WT ventral cells exhibit large changes in the magnitude and alignment of anisotropy in response to Rho1 activation.

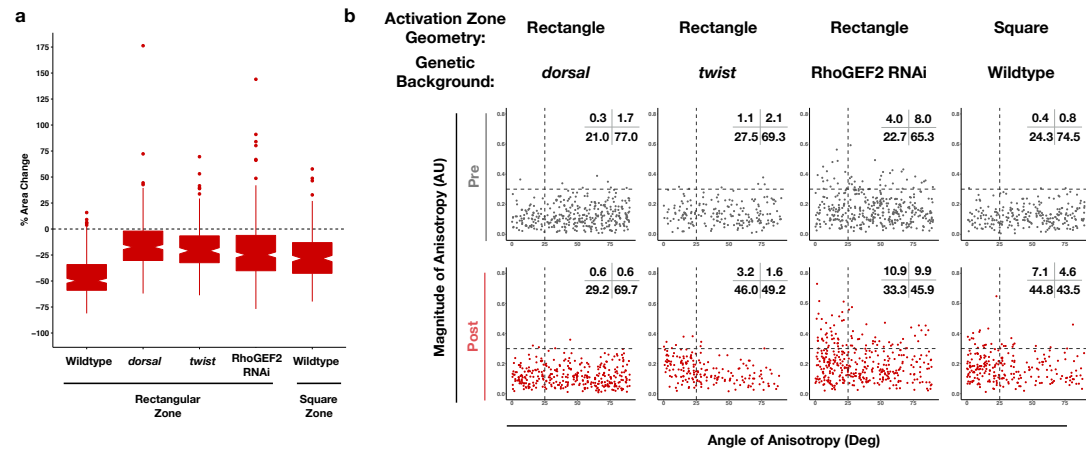

**Figure 4.** Dorsal is required for and Twist promotes aligned, anisotropic apical constriction in response to ectopic Rho1 activation.

a) Quantification of apical area change induced by optogenetic Rho1 activation in wildtype and mutant backgrounds. Note: The wildtype, rectangular activation zone data is repeated from **Figure 3c** to facilitate comparison. b) Anisotropy scatter plots, as in **Figure 3d**, for wildtype embryos subjected to a square region of ectopic Rho1 activation or specified mutant embryos subjected to a rectangular zone of activation. Insets show percentage of cells in each quadrant. Cells in the upper left quadrant exhibit highly aligned, anisotropic apical constriction. See **Figure 3–Figure Supplement 4** for plots of the changes in anisotropy of individual cells. 343 cells from 4 *dorsal* embryos, 189 cells from 3 *twist* embryos, 375 from 5 RhoGEF2 depleted embryos, and 239 cells from 5 square zone embryos were analyzed.

211 along the anterior-posterior axis of the embryo. However, we note that ventral cells lacking Twist  
 212 exhibit more aligned apical constriction than ventral cells lacking Dorsal (**Figure 4b, Figure 3–Figure**  
 213 **Supplement 4**). These distinct responses suggest that there is a Twist-independent mechanism  
 214 downstream of Dorsal that promotes aligned anisotropic apical constriction in response to Rho1  
 215 activation. We speculate that Snail is responsible for this Twist-independent behavior, but repeated  
 216 attempts to combine a null *snail* allele with our optogenetic components failed, so we were not  
 217 able to test this hypothesis.

218 Dorsal is required for and Twist promotes ventral cells to respond to ectopic Rho1 activation  
 219 with strong, aligned anisotropic apical constriction. This may reflect that the transcriptional targets  
 220 of Dorsal and Twist are required for Rho1 activation during endogenous ventral furrow forma-  
 221 tion. Thus, we tested whether Dorsal and Twist are required for anisotropic apical constriction  
 222 independent of their role in activating Rho1 by optogenetically activating Rho1 in ventral cells  
 223 depleted of RhoGEF2, the endogenous activator of actomyosin contractility during ventral furrow  
 224 formation. RhoGEF2 is required for proper organization of the actomyosin cytoskeleton during  
 225 cellularization, and embryos lacking RhoGEF2 have some cellularization defects, contributing to  
 226 irregularities in the epithelium (**Padash Barmchi et al., 2005**). Thus, a subset of cells depleted of  
 227 RhoGEF2 are anisotropic, though randomly aligned, before optogenetic activation (**Figure 4b**). De-  
 228 spite the non-uniformity in these epithelia, optogenetic activation of Rho1 in ventral cells depleted  
 229 of RhoGEF2 increased the extent of aligned, anisotropic apical constriction (**Figure 4, Figure 3–Figure**  
 230 **Supplement 4**). Ectopic invaginations induced in the ventral or dorsal epithelium of embryos lacking  
 231 RhoGEF2 failed to revert following cessation of optogenetic activation, in contrast to the rapid  
 232 reversion of ectopic deformations in otherwise wildtype tissues. This suggests RhoGEF2 makes a  
 233 significant contribution to the tension in the epithelium, likely through its role in organizing the acto-  
 234 myosin cytoskeleton. These results suggest ventral cells can respond to optogenetic Rho1 activation  
 235 with anisotropic apical constriction in the absence of endogenous Rho1 activity. However, elevated  
 236 Rho1 levels may contribute to strong, aligned, anisotropic apical constriction during endogenous  
 237 ventral furrow formation.



238 Our experiments in the dorsal epithelium suggest that an asymmetric zone of Rho1 activation is  
239 not always sufficient to generate aligned, anisotropic apical constriction. However, we wondered  
240 whether an asymmetric zone of Rho1 activation might contribute to the cell shape changes seen in  
241 ventral epithelial cells during ventral furrow formation. To address this question, we locally activated  
242 Rho1 in a square region in ventral cells before any obvious apical constriction. Rectangular activation  
243 regions result in more highly anisotropic constrictions than square activation regions (*Figure 4b v.*  
244 *Figure 3e-VentralPost, Figure 3-Figure Supplement 4*). Thus, even though an asymmetric zone of  
245 Rho1 activation is not sufficient to induce anisotropic apical constriction in the dorsal epithelium,  
246 the asymmetry of the zone of Rho1 activation promotes the highly aligned anisotropic apical  
247 constriction in the ventral epithelium.

248 Taken together, these results suggest that both an asymmetric zone of Rho1 activation and  
249 ventral-specific factors, genetically downstream of Dorsal and Twist, contribute to the ability of  
250 ventral cells to respond to ectopic Rho1 activation with aligned, anisotropic apical constriction.

### 251 **Spreading of deformations within the endogenous ventral furrow region**

252 We next asked whether optogenetic Rho1 activation would affect an already invaginating ventral  
253 furrow. Activation of Rho1 in a subset of cells locally accelerates their invagination (*Figure 5a*). This  
254 suggests Rho1 activity is rate-limiting during the invagination of the endogenous ventral furrow.  
255 Notably, the invagination of neighboring ventral furrow cells, outside of the defined activation  
256 region is also accelerated (*Figure 5a-red arrow*). Furthermore, optogenetic activation of Rho1 in the  
257 ventral epithelium prior to the onset of invagination frequently induces the invagination of both  
258 cells inside and neighboring the activation region (*Figure 5b-red arrow*). These non-autonomous  
259 cellular responses are not observed in the dorsal epithelium (*Figure 5c*). This ventral-specific  
260 response occurs in less than a minute, a time scale that is consistent with mechanical, rather than  
261 mechanochemical, transmission of forces. Thus, cells within the ventral and dorsal epithelia may  
262 exhibit differential mechanical properties.

### 263 **Differential responses of cells flanking the Rho1 activation zone in the dorsal and ventral epithelium**

264 Collectively, the results presented here suggest that ventral and dorsal cells exist in distinct me-  
265 chanical environments. To further explore this possibility, we generated ectopic zones of Rho1  
266 activation and focused on the behavior of cells adjacent to these zones. In the ventral epithelium, we  
267 observed extensive bending of non-activated cells towards optogenetically-induced invaginations  
268 (*Figure 6b, filled arrowheads*). This bending is readily visualized in maximum projections of the  
269 ventral surface post optogenetic activation, and it routinely extends several rows outside of the  
270 zone of photoactivation (*Figure 6b, filled arrowheads*). In contrast, long-range bending toward the  
271 ectopic invagination is not observed in the dorsal epithelium. Rather, the cells immediately adjacent  
272 to ectopic dorsal invaginations exhibit substantial stretching of their apical surfaces (*Figure 6a,*  
273 *open arrowheads*).

274 We quantified the bending of non-activated cells towards ectopic invaginations by measuring the  
275 change in the position of their apical centroids along the dorsal-ventral axis during the induction of  
276 the ectopic invaginations. Consistent with our visual observations, the centroids of the apical surface  
277 of non-activated ventral cells move substantially during the invagination of the photoactivated  
278 region, while the centroids of the apical surface of non-activated dorsal cells exhibit little movement  
279 during the comparable time (*Figure 6c*). Notably, dorsal cells neighboring ectopic invaginations are  
280 strongly biased towards expanding their apical surfaces, while the majority of ventral cells exhibit  
281 contraction of apical surfaces. Thus, not only do activated ventral and dorsal cells respond distinctly  
282 to optogenetic activation of Rho1, but the ventral and dorsal cells neighboring these regions of  
283 ectopic Rho1 activation respond distinctly to ectopic invaginations. These differential responses  
284 both within and adjacent to the activation zones suggest that the two epithelia exhibit differential  
285 mechanical properties.  
286

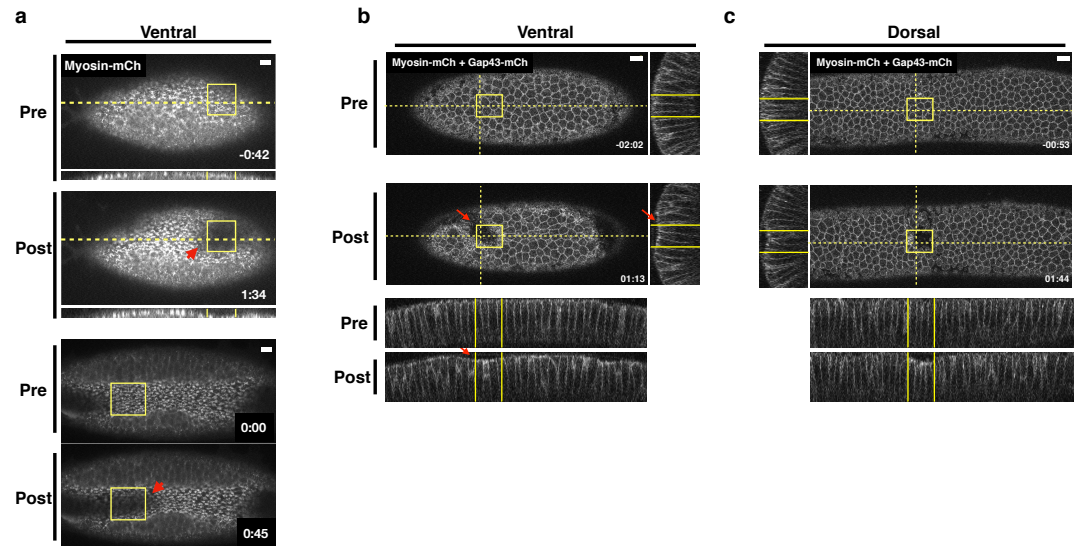

**Figure 5.** Optogenetic Rho1 activation specifically induces cell non-autonomous responses in the ventral epithelium.

a) Ventral epithelium of an embryos expressing the optogenetic components and Myosin-Ch and exhibiting an established furrow. Ectopic Rho1 activity accelerates the invagination of the endogenous ventral furrow. This acceleration extends outside of the zone of Rho1 activation (red arrow). Data representative of 3/5 embryos. b-c) Ventral (b) and dorsal (c) epithelium of an embryo expressing LOVSsrA, PR-GEF, Gap43-mCh, and Myosin-Ch at the onset of gastrulation. Optogenetic activation of Rho1 within the yellow box induces an ectopic invagination. This ectopic invagination extends outside the defined activation region in the ventral (b, red arrow) but not dorsal (c) epithelium. Data representative of 5/8 ventral and 4/4 dorsal embryos. Scale bars are 10 μm.

**Figure 5-video 1.** Movie of embryo shown in Figure 5a-bottom.

## 287 Discussion

288 Given the extensive evidence implicating Rho1 activation in ventral furrow formation, we assessed  
289 whether an asymmetric zone of Rho1 activity is sufficient to initiate this morphogenetic process  
290 in the *Drosophila* embryo. Optogenetic activation of Rho1 in the dorsal epithelium does not  
291 recapitulate all cell- and tissue-level aspects of ventral furrow formation. However, Rho1 activation  
292 in the ventral epithelium induces precocious furrowing that mirrors the endogenous process. We  
293 propose that this context-dependent response to ectopic Rho1 activation arises from distinct  
294 material properties of the dorsal and ventral epithelia.

## 295 A robust, ubiquitously expressed optogenetic system for use in *Drosophila*

296 The LOV-domain based optogenetic probe generated in this study is expressed ubiquitously through-  
297 out the *Drosophila* lifecycle. This ubiquitous and non-perturbing expression allows Rho1 activation  
298 to be readily controlled in any *Drosophila* tissue without the need to combine the probe with tissue-  
299 specific drivers. This probe acts rapidly, inducing Rho1 activity within a minute of photoactivation.  
300 Precise spatial control of Rho1 activation can be induced using a range of standard fluorescent  
301 imaging methods. Ectopic deformations induced by optogenetic Rho1 activation in the dorsal  
302 embryonic epithelium are limited to the zone of optogenetic Rho1 activation, and, in the wing  
303 periodical epithelium, Rho1 can be activated with subcellular precision.

## 304 Optogenetically-induced invaginations are reversible

305 Using this optogenetic approach, we demonstrate that ectopic Rho1 activation is sufficient to  
306 induce ectopic, tissue-level shape changes throughout the embryonic epithelium at the onset of  
307 gastrulation. The cell shape changes induced by optogenetic Rho1 activation in ventral cells closely  
308 mirror those seen during endogenous ventral furrow formation, and ectopic Rho1 activation can

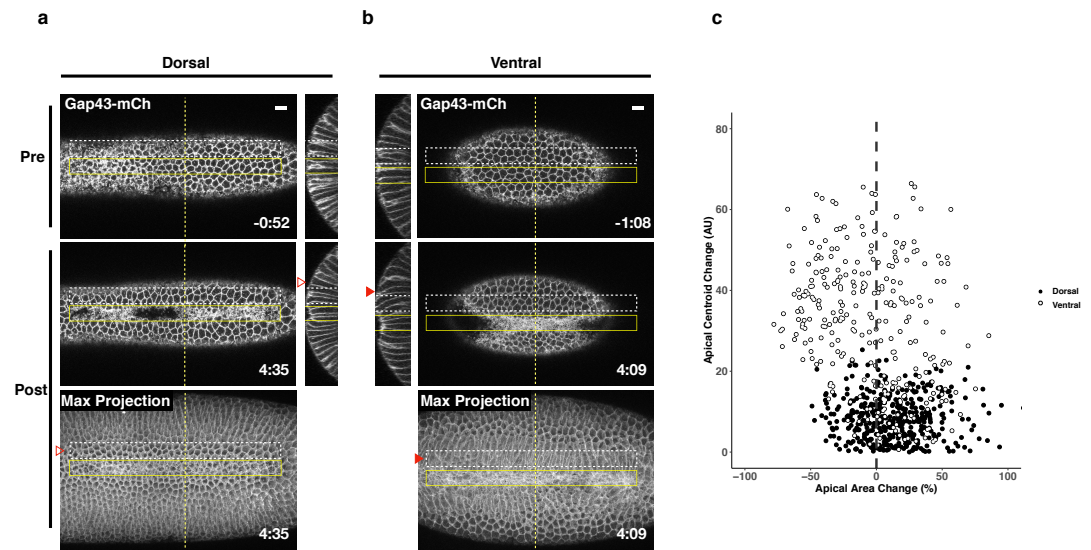

**Figure 6.** Non-activated cells bend towards ectopic invaginations specifically in the ventral epithelium. a-b) Dorsal (a) and ventral (b) epithelium of embryos expressing the optogenetic components and Gap43-mCh at the onset of gastrulation. Local Rho1 activation within the yellow box induces ectopic invaginations in both the dorsal and ventral epithelium. Bottom panels: Maximum intensity projections of the indicated time point. Data representative of 4/4 dorsal and 4/4 ventral embryos. c) Quantification of cell shape changes exhibited by cells neighboring ectopic invaginations. X axis is the percent apical area change; Y axis is the change in position of the centroid of the apical cell surface along the dorsal-ventral axis. 407 dorsal cells from 4 embryos and 298 ventral cells from 4 embryos were quantified. The white dashed boxes in a and b indicate the "neighbor" cells that were quantified for these two embryos. Filled arrowheads indicate long-range bending of ventral cells; open arrowheads indicate the corresponding cells in the dorsal epithelium. Dorsal cells at the periphery are not perpendicular to the imaging plane before or after photoactivation and therefore do not appear as hexagons in the maximum projection images. Time zero indicates the first pulse of blue light activation. Scale bars are 10  $\mu$ m.

309 modulate endogenous ventral furrow formation. This suggests that the potency of optogenetic  
310 activation of Rho1 via the LOV probe is on par with endogenous Rho1 activation during ventral  
311 furrowing.

312 Deformations induced by optogenetic activation of Rho1 persist through the duration of opto-  
313 genetic activation. However, invaginated cells rapidly revert to their pre-activation positions and  
314 expand their apical areas following cessation of photoactivation, concurrent with rapid dissipation  
315 of optogenetically-induced myosin. Similar reversibility occurs in the other tissues we examined as  
316 well as in cultured cells (*Wagner and Glotzer, 2016; Oakes et al., 2017*). This reveals the existence  
317 of potent, widespread mechanisms for inactivating Rho1 and its effectors. We infer that ventral  
318 furrow formation is driven by sustained Rho1 activation that overcomes this global inhibition.

### 319 **PR-GEF and RhoGEF2-CRY2 induce distinct cellular responses**

320 Our results are partially consistent with previous work, which activated Rho1 via membrane recruit-  
321 ment of a light-responsive RhoGEF2-CRY2 fusion protein (*Izquierdo et al., 2018*). Both optogenetic  
322 systems induce ectopic deformations in the dorsal embryonic epithelium, but only RhoGEF2-CRY2  
323 induces pulsatile Rho1 activity and anisotropic apical constriction in the dorsal epithelium.

324 The two systems use different RhoA/Rho1-specific GEFs, and this may underlie the differing  
325 results; LOV recruits LARG(DH) while CRY2 is fused to RhoGEF2(DHPH). Despite LARG being an  
326 extremely potent RhoA activator *in vitro* (*Jaiswal et al., 2013*), the transgene expressing LARG(DH)  
327 is well tolerated (*Table 6*), suggesting this recruitable GEF is non-perturbing. To directly compare  
328 LARG and RhoGEF2, we generated flies expressing SspB-GFP-RhoGEF2(DHPH) from the same  
329 genomic location as PR-GEF. This transgene does not readily homozygote even in the absence of  
330 the LOVssrA membrane anchor (*Table 6*), suggesting it has significant light-independent activity.  
331 PH domains of the GEF subfamily that includes RhoGEF2 and LARG bind RhoA-GTP, and, *in vitro*,  
332 the interaction between the PH domain and membrane-bound RhoA-GTP potentiates GEF activity  
333 by up to 40 fold (*Chen et al., 2010; Medina et al., 2013*). Introducing two point mutations (F1044A,  
334 I1046E) into the PH domain of RhoGEF2, which are predicted to disrupt its binding to RhoA-GTP,  
335 allows the resultant transgene to readily homozygote (*Table 6*). These observations are consistent  
336 with RhoGEF2-CRY2 acting via a feedforward mechanism where it can be recruited by Rho1-GTP  
337 via its PH domain and thereby amplify Rho1-GTP. The ability of RhoGEF2-CRY2 to amplify both  
338 endogenous and light-induced Rho1 activity would be predicted to be particularly potent when it  
339 is overexpressed from a UAS promoter via Gal4. Feedforward activation via RhoGEF2-CRY2 may  
340 combine with the aforementioned mechanisms for Rho1 inactivation to generate the pulsatile Rho1  
341 activity observed with RhoGEF2-CRY2 (*Izquierdo et al., 2018*). Amplification of endogenous Rho1  
342 activity by RhoGEF2-CRY2 could also explain the anisotropic apical constrictions induced when this  
343 probe is optogenetically activated in the dorsal epithelium. Activated cells in this epithelium would  
344 need to deform against increased resistive forces exerted by their neighbors as a result of chronic  
345 Rho1 activation.

346 Although the GEF domain of RhoGEF2 is perturbing when over-expressed as an isolated domain,  
347 in the context of the full length protein, its ability to generate positive feedback via its PH domain  
348 may contribute to the Rho1 activity pulses observed during ventral furrow formation (*Martin et al.,*  
349 *2009; Mason et al., 2016*).

### 350 **Requirements for ventral-specific responses to Rho1 activation**

351 Despite the ability of asymmetric zones of Rho1 activation to induce deformations in both dorsal  
352 and ventral embryonic epithelia, they only induced strong, aligned, anisotropic apical constriction in  
353 the ventral epithelium. Dorsal is required for and Twist promotes this ventral-specific response,  
354 consistent with the idea that this property is a consequence of the gene expression differences that  
355 result from dorsal-ventral patterning. Twist is required to stabilize Rho1-driven apical constriction  
356 (*Martin et al., 2009*). Here, Twist promotes anisotropic apical constriction induced by sustained  
357 Rho1 activation. While it is possible that these two defects result from loss of the expression of

358 a single Twist target gene, it is perhaps more likely that Twist controls the expression of multiple  
359 genes that independently contribute to ventral furrow formation. Notably, ventral cells lacking  
360 the Dorsal protein behave nearly identically to dorsal cells in wildtype embryos, while ventral cells  
361 lacking Twist exhibit weakly aligned, anisotropic apical constriction. Thus, a Twist-independent  
362 mechanism for generating aligned, anisotropic apical constriction must also exist. We speculate  
363 that Snail may also contribute to ventral-specific behavior.

364 Alternatively, Dorsal and/or Twist may be required for anisotropic apical constriction because  
365 each factor promotes Rho1 activation by RhoGEF2. However, ventral cells depleted of RhoGEF2  
366 exhibit an increase in magnitude and alignment of anisotropy following ectopic Rho1 activation;  
367 thus, elevated Rho1 activity alone does not explain this ventral-specific response. The muted change  
368 in anisotropy of ventral cells lacking RhoGEF2 compared to wildtype ventral cells can be explained  
369 by the fact that cells depleted of RhoGEF2 exhibit higher degrees of anisotropy prior to optogenetic  
370 activation of Rho1, most likely because the epithelium is disorganized due to defects in cytoskeletal  
371 organization and cellularization (*Padash Barmchi et al., 2005*). Future work should identify the  
372 molecular targets of Dorsal and Twist that mediate anisotropic apical constriction. Two candidates  
373 of particular interest are Rap1 and its GEF Dzy; ventral cells lacking either of these proteins exhibit  
374 more isotropic apical constriction than wildtype ventral cells (*Sawyer et al., 2009; Spahn et al.,*  
375 *2012*).

### 376 **Ventral and dorsal epithelia exhibit different material properties**

377 The response of embryonic epithelial cells to optogenetic Rho1 activation depends on their location  
378 within the epithelium. Specifically, ventral, but not dorsal, cells constrict anisotropically, ventral  
379 deformations spread outside the activated regions, and several rows of epithelial cells bend toward  
380 activated ventral regions. Thus, the differences seen upon Rho1 activation are not limited to the  
381 response of the activated cells to Rho1 activation.

382 We propose that these ventral-specific behaviors arise as a consequence of dorsoventral pat-  
383 terning that endows the ventral epithelium with material properties that are distinct from those of  
384 the dorsal epithelium. These material properties (e.g. stiffness, deformability) likely result from dif-  
385 ferential organization and dynamics of the cytoskeleton and the junctions linking the cytoskeletons  
386 of neighboring cells. This dorsoventral patterning appears to specify the length scale over which  
387 forces are transmitted through the tissue. Importantly, these properties do not solely result from  
388 Rho1 activation in ventral cells, as RhoGEF2-depleted cells retain some ventral characteristics. We  
389 suggest that these material properties shape the reciprocal interactions between Rho1-activated  
390 cells and their neighbors, influencing the response both within and outside the Rho1 activated  
391 region.

392 The molecules responsible for ventral-specific material properties are not known, but it may  
393 include regulated cell-cell adhesion and the associated cytoskeletal networks. During ventral  
394 furrow formation, E-cadherin molecules in ventral cells reorganize from a sub-apical position to an  
395 apical position and become more densely packed (*Weng and Wieschaus, 2016*). These junctional  
396 rearrangements may contribute to efficient transmission of intracellular contractility throughout  
397 the ventral epithelium. Junctions transmit these forces through interactions with the actomyosin  
398 cytoskeleton which in turn influence the behavior of adherens junctions (*Weng and Wieschaus,*  
399 *2016*). These interactions ultimately generate the supracellular actomyosin network observed  
400 during ventral furrow formation (*Martin et al., 2010; Yevick et al., 2019*). In our experiments, ectopic  
401 Rho1 activation was not sufficient to induce such networks in the dorsal epithelium, indicating a  
402 requirement for ventral-specific factors in their assembly.

403 The cellular behaviors observed during light-induced invaginations are remarkably similar to  
404 those that occur during endogenous ventral furrowing (*Costa et al., 1994; Leptin et al., 1992; Leptin*  
405 *and Grunewald, 1990; Sweeton et al., 1991*). These shape changes were widely thought to occur  
406 as a direct consequence of the transcriptional induction of Rho1-dependent contractility in the  
407 ventral epithelium. By comparing identical patterns and intensity of Rho1 activation in wildtype and

408 mutant tissues, we have shown that dorsoventral patterning has additional relevant targets beyond  
409 Rho1 activation.

## 410 **Conclusion**

411 In summary, this work shows that, despite inducing ectopic deformations, Rho1 activation alone  
412 is not sufficient to recapitulate the cell- and tissue-level behaviors observed during ventral furrow  
413 formation. Thus, a model of ventral furrow formation where Rho1 activity is the sole driver of  
414 cell and tissue behavior is incomplete. We propose that ventral-specific behaviors may arise from  
415 expression of factors that modulate the cytoskeleton and its connection to adherens junctions as  
416 well as promote strong intercellular coupling among cells of the ventral epithelium.

## 417 **Methods and Materials**

### 418 **Plasmids**

419 Plasmids used in this studied are listed in **Table 1**. pUbi-stop-mCD8GFP containing an attB site and  
420 pUbi>mEGFP-Anillin(RBD) were gifts from T. Lecuit. Plasmids created for this study were generated  
421 using SLiCE (**Zhang et al., 2012**) or one-step isothermal *in vitro* recombination (**Gibson et al., 2009**).  
422 Stargazin-GFP-LOVpep and PDZx2-mCherry-LARG(DH) plasmids were published previously (**Wagner  
423 and Glotzer, 2016**). Venus-iLID-CAAX and tgRFPt-SspB WT were obtained from Addgene (60411,  
424 60415). pMT>Gal4 (**Klueg et al., 2002**) was obtained from the Drosophila Genomics Resource  
425 Center.

### 426 **Fly stocks**

427 *Drosophila melanogaster* was cultured using standard techniques at 25°C. Both male and female  
428 animals were used. Stocks used in this study include *pUbi>Gap43-mCherry/TM3*, generated by  
429 P-element insertion and was a gift from A. Martin; *pSqh>Sqh-mCherry* (**Martin et al., 2009**);  $\Delta$  *halo AJ*  
430 *twist<sup>EY53R12</sup>/CyO*, a gift from M. Leptin; *dl<sup>1</sup> cn<sup>1</sup> sca<sup>1</sup>/CyO* (BID: 3236); *UAS>RhoGEF2 shRNA* (BID: 76255);  
431 *P(mat-tub-Gal4)mat67* (BID: 7062).

432 Transgenic flies were generated by PhiC31-directed integration (GenetiVision). Transgenic  
433 lines generated for this study include: *Ubi>Stargazin-GFP\*-LOVSsrA (attP2)*, *Ubi>Stargazin-GFP\*-  
434 LOV(I427V)SsrA (attP2)*, *Ubi>SspB-GFP-LARG(DH) (VK37)*, *Ubi>SspB-GFP-LARG(DH) (VK31)*, *Ubi>SspB-GFP-  
435 RhoGEF2(DHPH) (VK37)*, *Ubi>SspB-GFP-RhoGEF2(DHPH-F1044A, I1046E) (VK37)*, *Ubi>SspB-mScarlet (VK37)*,  
436 *Ubi>mCherry-Anillin(RBD) (attP40)*.

437 Genotypes of flies used in each experiment are listed in **Table 2** and **Table 3**.

### 438 **S2 cells**

439  $3.1 \times 10^6$  S2 cells were transfected with 100 ng pMT>tagRFP-SspB and 250 ng pMT>Stargazin-GFP\*-  
440 LOVSsrA or 250ng pMT>Stargazin-GFP\*-LOV(I427V)SsrA using dimethyldioctadecyl-ammonium  
441 bromide (Sigma) (**Han, 1996**) at 250 ug/mL in six well plates. Expression from the pMT promoter  
442 was induced 2 days after transfection by addition of 0.35 mM  $CuSO_4$ . Cells were imaged live 24 hrs  
443 after  $CuSO_4$  induction. 50  $\mu$ L of the S2 cell culture was plated on a glass slide and covered with a  
444 coverslip. Clay feet were used as spacers between the slide and coverslip. See **Table 5** for activation  
445 protocol details.

### 446 **Preparation of *Drosophila* tissues for live imaging**

447 *Drosophila* embryos were collected on apple juice agar plates for 90 min and aged for 90-120 min  
448 at 25°C such that a majority of embryos were completing cellularization at the time of mounting.  
449 Embryos were dechorionated in 30% bleach for 1 min, rinsed in water, aligned on an apple juice  
450 agar pad, and mounted on a coverslip with embryo glue (adhesive from double sided tape dissolved  
451 in heptane). The imaged surface (dorsal or ventral) was mounted on the coverslip. This coverslip  
452 was affixed via petroleum jelly to a metal slide with a hole in the center. Embryos were covered  
453 with halocarbon oil 200 immediately after mounting; they were not compressed.

454 Central nervous systems were dissected from wandering third instar larvae in Schneider's  
455 *Drosophila* Medium (Sigma) supplemented with 10% Fetal Bovine Serum (Thermo Fisher Scientific).  
456 Central nervous systems were imaged in a chamber comprising a coverslip affixed with petroleum  
457 jelly to a metal slide with a hole in the center. Following dissection, central nervous systems were  
458 mounted in the chamber such that their dorsal side contacted the coverslip. The chamber was  
459 flooded with Chan and Gehring's balanced solution (*Chan and Gehring, 1971*) to completely cover  
460 the central nervous system, and a gas-permeable membrane (YSI: 5793) was placed over the  
461 chamber to limit evaporation. These chambers were imaged on an inverted microscope.

462 Wing imaginal discs were dissected from wandering third instar larvae in S2 cell media supple-  
463 mented with 10% FBS. Wing discs were mounted between a slide and glass coverslip in 50uL Chan  
464 and Gehring's balanced solution. Clay feet were used as spacers between the slide and coverslip.

465 To prepare pupal nota, whole pupae were extracted from their pupal cases 18 hours post  
466 pupariation and mounted on a glass slide in a humid chamber, as described previously (*Zitserman  
467 and Roegiers, 2011*). Pupal nota were imaged on an upright microscope.

468 To image egg chambers, ovaries were dissected from 3-5 day old females aged on yeast. Individ-  
469 ual stage 10 egg chambers were isolated and mounted between a coverslip and a slide. Clay feet  
470 were used as a spacer between the slide and coverslip.

### 471 **Live imaging and optogenetic experiments**

472 Global activation experiments were performed on a 63x/1.4 numerical aperture (NA) oil immersion  
473 lens on a Zeiss Axiovert 200M equipped with a Yokogawa CSU-10 spinning disk unit (McBain) and  
474 illuminated with 50-mW, 473-nm and 20- mW, 561-nm lasers (Cobolt) or on a Zeiss Axioimager  
475 M1 equipped with a Yokogawa CSU-X1 spinning disk unit (Solamere) and illuminated with 50-mW,  
476 488-nm and 50-mW, 561-nm lasers (Coherent). Images were captured on a Cascade 1K electron  
477 microscope (EM) CCD camera, a Cascade 512BT (Photometrics), or a Prime 95B (Photometrics)  
478 controlled by MetaMorph (Molecular Devices). Photoactivation was accomplished by illuminating  
479 the sample with 488 nm light for the indicated exposure times (*Table 4 & Table 5*).

480 Local activation experiments were performed on a inverted Zeiss LSM880 laser scanning confocal  
481 microscope with a 40X/1.4 numerical aperture (NA) objective. mCherry or mScarlet fluorescence was  
482 excited using the 561 nM solid state laser and was detected via a GaAsP spectral detector. Activation  
483 regions, indicated with yellow boxes throughout this manuscript, were defined in the "Bleaching"  
484 module. Pixels within the defined activation zone were exposed to 488nm light attenuated to 0.01  
485 or 0.1 percent laser transmittance, using an Acousto-optic tunable filter, for 15 iterations every  
486 20 seconds for the duration of the activation period. In general, we acquired a "pre" Z-Series of  
487 Gap43-mCh or Sqh-mCh, activated the defined region with 488nm light in a single Z-plane, and  
488 acquired a "post" Z-Series of Gap43-mCh or Sqh-mCh. See *Table 4 & Table 5* for specific activation  
489 protocols for each experiment.

### 490 **Image processing and cell shape analysis**

491 All images were processed with Fiji (*Schindelin et al., 2012*). TissueAnalyzer (*Aigouy et al., 2010*),  
492 a Fiji plugin, was used to segment the embryonic epithelium and track cells for quantification  
493 of apical area, apical cell anisotropy, and apical cell centroid. "Pre" and "Post" Z-stacks were  
494 tracked separately in TissueAnalyzer, and data for the apical area, apical cell elongation (a proxy  
495 for anisotropy), and apical cell centroid were extracted from each timepoint and concatenated  
496 into a master database. Percent area change of the apical cell surface was calculated as (EndArea-  
497 StartArea)/StartArea\*100. Magnitude of anisotropy, calculated in TissueAnalyzer, is a value ranging  
498 between 0 and 1, with 0 being highly isotropic and 1 being highly anisotropic. We converted the  
499 orientation of this anisotropy, calculated in TissueAnalyzer, to degrees for plotting (*Aigouy et al.,  
500 2010*). Data were plotted in RStudio with ggplot2.

## 501 Acknowledgements

502 This work was supported by R01GM085087, R35GM12709, and a France and Chicago Collaborating  
503 through the Sciences grant (M.G.), R01NS034783 (R.G.F.), and NIH T32 GM007183 and NSF GRFP DGE-  
504 1144082; DGE-1746045 (A.R). We thank Ed Munro for helpful comments on this manuscript. We  
505 thank Ed Munro, Sally Horne-Badovinac, Thomas Lecuit, M.G. lab members, and R.G.F. lab members  
506 for helpful discussions and support. Benoit Aigouy provided assistance with TissueAnalyzer. Audrey  
507 Williams helped with oocyte dissections. We thank the Glick, Martin, Leptin, and Lecuit labs for  
508 generous sharing of reagents. We thank Ben Glick for access to the SnapGene molecular biology  
509 software (<http://www.snapgene.com>). Stocks obtained from the Bloomington *Drosophila* Stock  
510 Center (NIH P40OD018537) were used in this study. Reagents obtained from *Drosophila* Genomics  
511 Resource Center, supported by NIH grant 2P40OD010949 were used in this study.

## 512 References

- 513 Aigouy, B., Farhadifar, R., Staple, D. B., Sagner, A., Röper, J.-C., Jülicher, F., and Eaton, S. (2010). Cell flow reorients  
514 the axis of planar polarity in the wing epithelium of *Drosophila*. *Cell*, 142(5):773–786.
- 515 Chan, L. N. and Gehring, W. (1971). Determination of blastoderm cells in *Drosophila melanogaster*. *Proceedings*  
516 *of the National Academy of Sciences of the United States of America*, 68(9):2217–2221.
- 517 Chen, Z., Medina, F., Liu, M.-y., Thomas, C., Sprang, S. R., and Sternweis, P. C. (2010). Activated RhoA binds to the  
518 pleckstrin homology (PH) domain of PDZ-RhoGEF, a potential site for autoregulation. *The Journal of Biological*  
519 *Chemistry*, 285(27):21070–21081.
- 520 Christie, J. M., Corchnoy, S. B., Swartz, T. E., Hokenson, M., Han, I.-S., Briggs, W. R., and Bogomolni, R. A.  
521 (2007). Steric interactions stabilize the signaling state of the LOV2 domain of phototropin 1. *Biochemistry*,  
522 46(32):9310–9319.
- 523 Costa, M., Wilson, E. T., and Wieschaus, E. (1994). A putative cell signal encoded by the folded gastrulation gene  
524 coordinates cell shape changes during *Drosophila* gastrulation. *Cell*, 76(6):1075–1089.
- 525 Dawes-Hoang, R. E., Parmar, K. M., Christiansen, A. E., Phelps, C. B., Brand, A. H., and Wieschaus, E. F. (2005).  
526 folded gastrulation, cell shape change and the control of myosin localization. *Development*, 132(18):4165–4178.
- 527 Doubrovinski, K., Tchoufag, J., and Mandadapu, K. (2018). A simplified mechanism for anisotropic constriction in  
528 *Drosophila* mesoderm. *Development*, 145(24).
- 529 Fox, D. T. and Peifer, M. (2007). Abelson kinase (Abl) and RhoGEF2 regulate actin organization during cell  
530 constriction in *Drosophila*. *Development*, 134(3):567–578.
- 531 Gao, G.-J. J., Holcomb, M. C., Thomas, J. H., and Blawdziewicz, J. (2016). Embryo as an active granular fluid:  
532 stress-coordinated cellular constriction chains. *Journal of physics. Condensed matter : an Institute of Physics*  
533 *journal*, 28(41):414021.
- 534 Gibson, D. G., Young, L., Chuang, R.-Y., Venter, J. C., Hutchison, C. A., and Smith, H. O. (2009). Enzymatic assembly  
535 of DNA molecules up to several hundred kilobases. *Nature Methods*, 6(5):343–345.
- 536 Gilmour, D., Rembold, M., and Leptin, M. (2017). From morphogen to morphogenesis and back. *Nature*,  
537 541(7637):311–320.
- 538 Guntas, G., Hallett, R. A., Zimmerman, S. P., Williams, T., Yumerefendi, H., Bear, J. E., and Kuhlman, B. (2015).  
539 Engineering an improved light-induced dimer (iLID) for controlling the localization and activity of signaling  
540 proteins. *Proceedings of the National Academy of Sciences*, 112(1):112–117.
- 541 Han, K. (1996). An efficient DDAB-mediated transfection of *Drosophila* S2 cells. *Nucleic Acids Research*,  
542 24(21):4362–4363.
- 543 Ip, Y. T., Park, R. E., Kosman, D., Yazdanbakhsh, K., and Levine, M. (1992). dorsal-twist interactions establish snail  
544 expression in the presumptive mesoderm of the *Drosophila* embryo. *Genes & Development*, 6(8):1518–1530.
- 545 Izquierdo, E., Quinkler, T., and De Renzis, S. (2018). Guided morphogenesis through optogenetic activation of  
546 Rho signalling during early *Drosophila* embryogenesis. *Nature Communications*, 9(1):2366.



- 547 Jaiswal, M., Dvorsky, R., and Ahmadian, M. R. (2013). Deciphering the molecular and functional basis of Db1  
548 family proteins: a novel systematic approach toward classification of selective activation of the Rho family  
549 proteins. *Journal of Biological Chemistry*, 288(6):4486–4500.
- 550 Jiang, J., Kosman, D., Ip, Y. T., and Levine, M. (1991). The dorsal morphogen gradient regulates the mesoderm  
551 determinant twist in early Drosophila embryos. *Genes & Development*, 5(10):1881–1891.
- 552 Kerridge, S., Munjal, A., Philippe, J.-M., Jha, A., de las Bayonas, A. G., Saurin, A. J., and Lecuit, T. (2016). Modular  
553 activation of Rho1 by GPCR signalling imparts polarized myosin II activation during morphogenesis. *Nature*  
554 *Cell Biology*, 18(3):261–270.
- 555 Klueg, K. M., Alvarado, D., Muskavitch, M. A. T., and Duffy, J. B. (2002). Creation of a GAL4/UAS-coupled inducible  
556 gene expression system for use in Drosophila cultured cell lines. *genesis*, 34(1-2):119–122.
- 557 Ko, C. S. and Martin, A. C. (2020). The cellular and molecular mechanisms that establish the mechanics of  
558 Drosophila gastrulation. *Current topics in developmental biology*, 136:141–165.
- 559 Kölsch, V., Seher, T., Fernandez-Ballester, G. J., Serrano, L., and Leptin, M. (2007). Control of Drosophila  
560 gastrulation by apical localization of adherens junctions and RhoGEF2. *Science*, 315(5810):384–386.
- 561 Leptin, M., Casal, J., Grunewald, B., and Reuter, R. (1992). Mechanisms of early Drosophila mesoderm formation.  
562 *Development (Cambridge, England). Supplement*, pages 23–31.
- 563 Leptin, M. and Grunewald, B. (1990). Cell shape changes during gastrulation in Drosophila. *Development*,  
564 110(1):73–84.
- 565 Manning, A. J., Peters, K. A., Peifer, M., and Rogers, S. L. (2013). Regulation of epithelial morphogenesis by the G  
566 protein-coupled receptor mist and its ligand fog. *Science Signaling*, 6(301):ra98–ra98.
- 567 Martin, A. C., Gelbart, M., Fernandez-Gonzalez, R., Kaschube, M., and Wieschaus, E. F. (2010). Integration of  
568 contractile forces during tissue invagination. *The Journal of Cell Biology*, 188(5):735–749.
- 569 Martin, A. C., Kaschube, M., and Wieschaus, E. F. (2009). Pulsed contractions of an actin-myosin network drive  
570 apical constriction. *Nature*, 457(7228):495–499.
- 571 Mason, F. M., Xie, S., Vasquez, C. G., Tworoger, M., and Martin, A. C. (2016). RhoA GTPase inhibition organizes  
572 contraction during epithelial morphogenesis. *The Journal of Cell Biology*, 127:jcb.201603077.
- 573 Medina, F., Carter, A. M., Dada, O., Gutowski, S., Hadas, J., Chen, Z., and Sternweis, P. C. (2013). Activated RhoA  
574 is a positive feedback regulator of the Lbc family of Rho guanine nucleotide exchange factor proteins. *The*  
575 *Journal of Biological Chemistry*, 288(16):11325–11333.
- 576 Morisato, D. and Anderson, K. V. (1995). Signaling pathways that establish the dorsal-ventral pattern of the  
577 Drosophila embryo. *Annual Review of Genetics*, 29(1):371–399.
- 578 Munjal, A., Philippe, J.-M., Munro, E., and Lecuit, T. (2015). A self-organized biomechanical network drives shape  
579 changes during tissue morphogenesis. *Nature*, 524(7565):351–355.
- 580 Nikolaidou, K. K. and Barrett, K. (2004). A Rho GTPase signaling pathway is used reiteratively in epithelial folding  
581 and potentially selects the outcome of Rho activation. *Current Biology*, 14(20):1822–1826.
- 582 Oakes, P. W., Wagner, E., Brand, C. A., Probst, D., Linke, M., Schwarz, U. S., Glotzer, M., and Gardel, M. L.  
583 (2017). Optogenetic control of RhoA reveals zyxin-mediated elasticity of stress fibres. *Nature Communications*,  
584 8:15817.
- 585 Padash Barmchi, M., Rogers, S., and Häcker, U. (2005). DRhoGEF2 regulates actin organization and contractility  
586 in the Drosophila blastoderm embryo. *The Journal of Cell Biology*, 168(4):575–585.
- 587 Parks, S. and Wieschaus, E. (1991). The Drosophila gastrulation gene concertina encodes a G alpha-like protein.  
588 *Cell*, 64(2):447–458.
- 589 Piekny, A. J. and Glotzer, M. (2008). Anillin Is a Scaffold Protein That Links RhoA, Actin, and Myosin during  
590 Cytokinesis. *Current Biology*, 18(1):30–36.
- 591 Rauzi, M., Krzic, U., Saunders, T. E., Krajnc, M., Zihler, P., Hufnagel, L., and Leptin, M. (2015). Embryo-scale tissue  
592 mechanics during Drosophila gastrulation movements. *Nature Communications*, 6(1):8677.

- 593 Sawyer, J. K., Harris, N. J., Slep, K. C., Gaul, U., and Peifer, M. (2009). The *Drosophila* afadin homologue Canoe  
594 regulates linkage of the actin cytoskeleton to adherens junctions during apical constriction. *The Journal of Cell*  
595 *Biology*, 186(1):57–73.
- 596 Schindelin, J., Arganda-Carreras, I., Frise, E., Kaynig, V., Longair, M., Pietzsch, T., Preibisch, S., Rueden, C., Saalfeld,  
597 S., Schmid, B., Tinevez, J.-Y., White, D. J., Hartenstein, V., Eliceiri, K., Tomancak, P., and Cardona, A. (2012). Fiji:  
598 an open-source platform for biological-image analysis. *Nature Methods*, 9(7):676–682.
- 599 Spahn, P., Ott, A., and Reuter, R. (2012). The PDZ-GEF protein Dizzy regulates the establishment of adherens  
600 junctions required for ventral furrow formation in *Drosophila*. *Journal of Cell Science*, 125(Pt 16):3801–3812.
- 601 Strickland, D., Lin, Y., Wagner, E., Hope, C. M., Zayner, J., Antoniou, C., Sosnick, T. R., Weiss, E. L., and Glotzer, M.  
602 (2012). TULIPs: tunable, light-controlled interacting protein tags for cell biology. *Nature Methods*, 9(4):379–384.
- 603 Sweeton, D., Parks, S., Costa, M., and Wieschaus, E. (1991). Gastrulation in *Drosophila*: the formation of the  
604 ventral furrow and posterior midgut invaginations. *Development*, 112(3):775–789.
- 605 Wagner, E. and Glotzer, M. (2016). Local RhoA activation induces cytokinetic furrows independent of spindle  
606 position and cell cycle stage. *The Journal of Cell Biology*, 213(6):641–649.
- 607 Weng, M. and Wieschaus, E. (2016). Myosin-dependent remodeling of adherens junctions protects junctions  
608 from Snail-dependent disassembly. *The Journal of Cell Biology*, 212(2):219–229.
- 609 Wenzl, C., Yan, S., Laupsien, P., and Großhans, J. (2010). Localization of RhoGEF2 during *Drosophila* cellularization  
610 is developmentally controlled by Slam. *Mechanisms of Development*, 127(7-8):371–384.
- 611 Yevick, H. G., Miller, P. W., Dunkel, J., and Martin, A. C. (2019). Structural Redundancy in Supracellular Actomyosin  
612 Networks Enables Robust Tissue Folding. *Developmental Cell*, 50(5):586–598.e3.
- 613 Zhang, Y., Werling, U., and Edelmann, W. (2012). SLICE: a novel bacterial cell extract-based DNA cloning method.  
614 *Nucleic Acids Research*, 40(8):e55.
- 615 Zitserman, D. and Roegiers, F. (2011). Live-cell imaging of sensory organ precursor cells in intact *Drosophila*  
616 pupae. *Journal of Visualized Experiments*, (51).

**Table 1.** Plasmids Used

| Plasmid Generated                                                                            | Fragment Source                                                                                                                                                                                                                              | Backbone Source                                                      |
|----------------------------------------------------------------------------------------------|----------------------------------------------------------------------------------------------------------------------------------------------------------------------------------------------------------------------------------------------|----------------------------------------------------------------------|
| pMT>Stargazin-GFP*-LOVSSrA<br>(* represents inactivation of fluorophore with Y66C mutation.) | Stargazin-GFP amplified from Stargazin-GFP-LOVpep<br>( <i>Wagner and Glotzer, 2016</i> )<br>LOVSSrA amplified from Venus-ILID-CAAX<br>( <i>Guntas et al., 2015</i> ) (Addgene: 60411)<br>GFP silenced by<br>site-directed mutagenesis (Y66C) | pMT>Gal4 ( <i>Kluug et al., 2002</i> )                               |
| pMT>Stargazin-GFP*-LOV(I427V)SSrA                                                            | N/A                                                                                                                                                                                                                                          | pMT>Stargazin-GFP*-LOVSSrA<br>w/ site directed mutagenesis           |
| pUbi>Stargazin-GFP*-LOVSSrA                                                                  | Stargazin-GFP*-LOVSSrA amplified from<br>pMT>Stargazin-GFP*-LOVSSrA                                                                                                                                                                          | pUbi-stop-mCD8GFP<br>(Contains attB site)                            |
| pUbi>Stargazin-GFP*-LOV(I427V)SSrA                                                           | Stargazin-GFP*-LOV(I427V)SSrA amplified from<br>pMT>Stargazin-GFP*-LOV(I427V)SSrA                                                                                                                                                            | pUbi-stop-mCD8GFP<br>(Contains attB site)                            |
| pUbi>SspB-GFP-LARG(DH)                                                                       | LARG(DH) amplified from PDZX2-mCherry-LARG(DH)<br>( <i>Wagner and Glotzer, 2016</i> )<br>SspB amplified from tgRFPT-SspB(WT)<br>( <i>Guntas et al., 2015</i> ) (Addgene: 60415)                                                              | pUbi-stop-mCD8GFP<br>(Contains attB site)                            |
| pMT>tagRFP-SspB                                                                              | SspB amplified from tgRFPT-SspB(WT)<br>( <i>Guntas et al., 2015</i> ) (Addgene: 60415)                                                                                                                                                       | pMT>Gal4                                                             |
| pUbi>SspB-mScar                                                                              | SspB amplified from<br>pMT>tagRFP-SspB<br>mScar amplified from<br>pmScarlet-C1 (Addgene: 85042)                                                                                                                                              | pUbi-stop-mCD8GFP<br>(Contains attB site)                            |
| pUbi>SspB-GFP-RhoGEF2(DHPH)                                                                  | RhoGEF2(DHPH) amplified from genomic prep of<br>Sp/CyO; UASp>RFP-RhoGEF2/TM3<br>( <i>Wenzl et al., 2010</i> )                                                                                                                                | pUbi-SspB-GFP-LARG(DH)<br>(Replace LARG(DH))<br>(Contains attB site) |
| RhoGEF2(DHPH-F1044A,I1046E)                                                                  | N/A                                                                                                                                                                                                                                          | pUbi>SspB-GFP-RhoGEF2(DHPH)<br>w/ site directed mutagenesis          |
| pUbi>mCherry-Anillin(RBD)                                                                    | Anillin(RBD) amplified from<br>pUbi>mEGFP-Anillin(RBD) ( <i>Munjal et al., 2015</i> )<br>mCherry amplified from<br>pm-Cherry2B (F. Valbuena and B. Glick,<br>manuscript in preparation)                                                      | pUbi-stop-mCD8GFP<br>(Contains attB site)                            |

**Table 2.** Genotypes and Reproducibility: Main Figures

| Figure | Genotype                                                                                                                                                                                                                                                                                                                                                                                                                                                                        | Replicates                                                                             |
|--------|---------------------------------------------------------------------------------------------------------------------------------------------------------------------------------------------------------------------------------------------------------------------------------------------------------------------------------------------------------------------------------------------------------------------------------------------------------------------------------|----------------------------------------------------------------------------------------|
| 1b     | <i>SspB-mScarlet</i> ; <i>Stargazin-GFP*-LOVSSrA</i>                                                                                                                                                                                                                                                                                                                                                                                                                            | 4/4 embryos                                                                            |
| 1d     | <i>SspB-GFP-LARG(DH)</i> ; <i>Stargazin-GFP*-LOVSSrA</i> , <i>Sqh-mCherry</i> / <i>Stargazin-GFP*-LOVSSrA</i>                                                                                                                                                                                                                                                                                                                                                                   | 5/5 embryos                                                                            |
| 2      | <i>SspB-GFP-LARG(DH)</i> ; <i>Stargazin-GFP*-LOVSSrA</i> , <i>Sqh-mCherry</i> / <i>Stargazin-GFP*-LOVSSrA</i>                                                                                                                                                                                                                                                                                                                                                                   | 7/7 embryos (a)<br>5/5 embryos (b)                                                     |
| 3      | <i>SspB-GFP-LARG(DH)</i> ; <i>Stargazin-GFP*-LOVSSrA</i> , <i>Gap43-mCherry</i>                                                                                                                                                                                                                                                                                                                                                                                                 | 2/2 embryos; 7/8 cells (a)<br>4/4 embryos; 444 cells (b)<br>4/4 embryos; 288 cells (c) |
| 4      | $\Delta$ <i>halo AJ twist<sup>EX53R12</sup></i> ; <i>SspB-GFP-LARG(DH)</i> , <i>Stargazin-GFP*-LOVSSrA</i> , <i>Gap43-mCherry</i><br><i>d<sup>11</sup> cn<sup>1</sup> sca<sup>1</sup></i> ; <i>SspB-GFP-LARG(DH)</i> , <i>Stargazin-GFP*-LOVSSrA</i> , <i>Gap43-mCherry</i><br><i>P(mat-tub-Gal4)mat67</i> / <i>SspB-GFP-LARG(DH)</i> ; <i>SspB-GFP-LARG(DH)</i> ,<br><i>Stargazin-GFP*-LOVSSrA</i> , <i>Gap43-mCherry</i> / <i>Stargazin-GFP*-LOVSSrA UAS&gt;RhoGEF2 shRNA</i> | 3/3 embryos; 189 cells<br>4/4 embryos; 343 cells<br>5/5 embryos; 375 cells             |
| 5a     | <i>SspB-GFP-LARG(DH)</i> ; <i>Stargazin-GFP*-LOVSSrA</i> , <i>Gap43-mCherry</i> ( <i>square zone</i> )                                                                                                                                                                                                                                                                                                                                                                          | 5/5 embryos; 239 cells                                                                 |
| 5b-c   | <i>SspB-GFP-LARG(DH)</i> ; <i>Stargazin-GFP*-LOVSSrA</i> , <i>Sqh-Ch</i><br><i>SspB-GFP-LARG(DH)</i> ; <i>Stargazin-GFP*-LOVSSrA</i> , <i>Gap43-mCherry</i> /<br><i>Stargazin-GFP*-LOVSSrA</i> , <i>Sqh-mCherry</i>                                                                                                                                                                                                                                                             | 3/5 embryos<br>5/8 embryos (ventral, b)<br>4/4 embryos (dorsal, c)                     |
| 6      | <i>SspB-GFP-LARG(DH)</i> ; <i>Stargazin-GFP*-LOVSSrA</i> , <i>Gap43-mCherry</i>                                                                                                                                                                                                                                                                                                                                                                                                 | 4/4 embryos (a)<br>4/4 embryos (b)<br>407 cells, dorsal (c)<br>298 cells, ventral (c)  |

**Table 3.** Genotypes and Reproducibility: Supplemental Figures

| Figure       | Genotype                                                                           | Replicates                                    |
|--------------|------------------------------------------------------------------------------------|-----------------------------------------------|
| 1-S1a        |                                                                                    | 2/2 pupae                                     |
| 1-S1b        | <i>SspB-GFP-LARG(DH); Stargazin-GFP*-LOV5sra, Sqh-mCherry</i>                      | 4/4 egg chambers                              |
| 1-S1c        |                                                                                    | 5/5 (left), 3/3 (right) wing discs            |
| 1-S1d        |                                                                                    | 2 CNSs ; 6 Neuroblasts                        |
| 1-S2         | <i>SspB-GFP-LARG(DH); Stargazin-GFP*-LOV5sra, Sqh-mCherry</i>                      | 3/3 wing discs                                |
| 1-S3a-top    | Transfection: <i>tagRFP-SspB + Stargazin-GFP*-LOV5sra</i>                          | 3/3 cells                                     |
| 1-S3a-bottom | Transfection: <i>tagRFP-SspB + Stargazin-GFP*-LOV(l427V)Ssra</i>                   | 3/3 cells                                     |
| 1-S3c-top    | <i>SspB-GFP-LARG(DH) Ubi&gt;mCherry-Anillin(RB) ; Stargazin-GFP*-LOV5sra</i>       | 3 brains ; 16 neuroblasts                     |
| 1-S3c-bottom | <i>SspB-GFP-LARG(DH) Ubi&gt;mCherry-Anillin(RB); Stargazin-GFP*-LOV(l427V)Ssra</i> | 4 brains ; 19 neuroblasts                     |
| 2-S1         | <i>SspB-GFP-LARG(DH) ; Stargazin-GFP*-LOV5sra, Sqh-Ch / Stargazin-GFP*-LOV5sra</i> | 5/5 embryos (dorsal)<br>4/4 embryos (ventral) |
| 3-S1         | <i>SspB-GFP-LARG(DH) ; Stargazin-GFP*-LOV5sra, Gap43-Ch</i>                        | 3/3 embryos                                   |
| 3-S3         | <i>SspB-GFP-LARG(DH) ; Stargazin-GFP*-LOV5sra, Gap43-Ch</i>                        | 4/4 embryos                                   |
| 3-S4         | see Fig. 3 & 4                                                                     | see Fig. 3 & 4                                |

**Table 4.** Activation Protocols: Main Figures

| Figure | Microscope, Wavelength | Activation Protocol          | Total Activation Time |
|--------|------------------------|------------------------------|-----------------------|
| 1b     | LSM880, 488nm          | Every 20 sec                 | 1 min 40 sec          |
| 1d     | Spinning Disc, 488nm   | Global (1000ms) every 20 sec | 1 min                 |
| 2 a-b  | LSM880, 488nm          | Every 20 sec                 | 4min                  |
| 3a-b   | LSM880, 488nm          | Every 20 sec                 | 4 min                 |
| 4      | LSM880, 488nm          | Every 20 sec                 | 4 min                 |
| 5a     | LSM880, 488nm          | Every 20 sec                 | 1 min 20 sec          |
| 5b     | LSM880, 488nm          | Every 20 sec                 | 1 min 20 sec          |
| 5c     | LSM880, 488nm          | Every 20 sec                 | 1 min 40 sec          |
| 6a-b   | LSM880, 488nm          | Every 20 sec                 | 4 min                 |

**Table 5.** Activation Protocols: Supplemental Figures

| Figure  | Microscope, Wavelength | Activation Protocol                                   | Total Activation Time                       |
|---------|------------------------|-------------------------------------------------------|---------------------------------------------|
| 1-S1a   | Spinning Disc, 488nm   | Global every 15 sec                                   | 30 sec                                      |
| 1-S1b   | Spinning Disc, 488nm   | Global every 5 sec                                    | 15 sec                                      |
| 1-S1c   | LSM880, 488nm          | Every 20 sec                                          | 2:01 min (left)<br>1:40 (right)             |
| 1-S1d   | LSM880, 488nm          | Every 20 sec                                          | 1 min                                       |
| 1-S2    | LSM880, 405nm          | Every 20 sec<br>(See indicated percent transmittance) | 2 min 20 sec                                |
| 1-S3a-b | Spinning Disc, 488nm   | Global every 5 sec                                    | 5 sec                                       |
| 1-S3c   | Spinning Disc, 488nm   | Global every 5 sec                                    | 20 sec                                      |
| 2-S1    | LSM880, 488nm          | Every 20 sec                                          | 6 min 35 sec (left)<br>4 min 11 sec (right) |
| 3-S3    | LSM880, 488nm          | Every 20 sec                                          | 1 min 40 sec                                |
| 3-S4    | LSM880, 488nm          | Every 20 sec                                          | 4 min                                       |

**Table 6.** Recruitable GEF Viability Tests

| Cross Scored                               | Possible Genotype                | Observed | Expected | Chi <sup>2</sup> |
|--------------------------------------------|----------------------------------|----------|----------|------------------|
| SspB-GFP-LARG(DH)/CyO x                    | 1) LARG (DH)/CyO                 | 379      | 362.7    | 2.198            |
| SspB-GFP-LARG(DH)/CyO                      | 2) LARG(DH)/LARG(DH)             | 165      | 181.3    |                  |
| SspB-GFP-RhoGEF2(DHPH)/CyO x               | 1) RhoGEF2(DHPH)/CyO             | 318      | 248      | 59.27            |
| SspB-GFP-RhoGEF2(DHPH)/CyO                 | 2) RhoGEF2(DHPH)/RhoGEF2(DHPH)   | 54       | 124      |                  |
| SspB-GFP-RhoGEF2(DHPH-F1044A,I1046E)/CyO x | 1) RhoGEF2(DHPH*)/CyO            | 430      | 414.7    | 1.694            |
| SspB-GFP-RhoGEF2(DHPH-F1044A,I1046E)/CyO   | 2) RhoGEF2(DHPH*)/RhoGEF2(DHPH*) | 192      | 207.3    |                  |



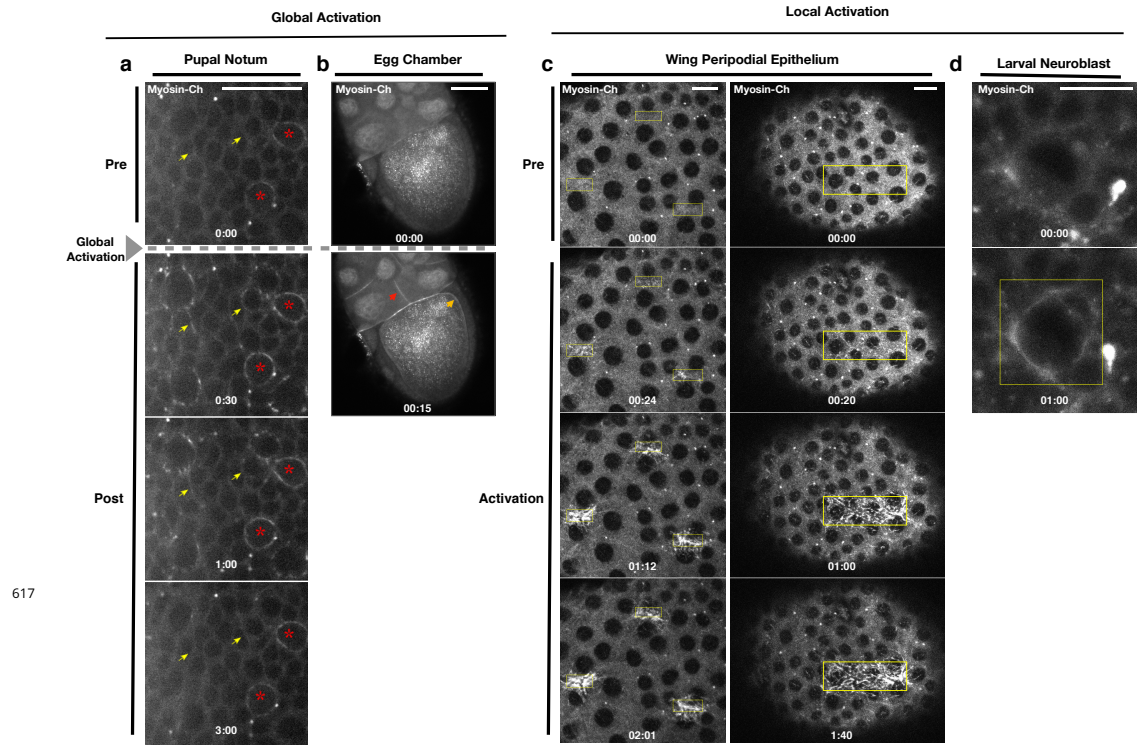

**Figure 1-Figure supplement 1.** Recruitment of PR-GEF activates Rho1 in all tissues tested.

a) Pupal Notum expressing the optogenetic probes. Myosin-Ch is shown before and after global photoactivation. Yellow arrow indicates the same cell junction over time. Asterisks indicate mitotic cells. Data representative of 2/2 pupae. b) Egg chambers expressing the optogenetic probes. Myosin-Ch is shown before and after global photoactivation. Nurse cell junctions (red arrow) and the oocyte cortex (yellow arrow) are indicated. Data representative of 4/4 egg chambers. c-d) Larval wing imaginal discs (c) and larval neuroblast (d) expressing the optogenetic probes. Rho1 was locally photoactivated within the yellow boxes. Myosin-Ch is shown before and during activation. Myosin-Ch accumulates with sub-cellular precision in the peripodial epithelium, consisting of squamous cells (c, left). Data representative of 5/5 wing discs (c, left), 3/3 wing discs (c, right), and 6/6 neuroblasts from 2 central nervous systems (d). Time zero indicates the first pulse of blue light activation. Scale bars are 10 μm.

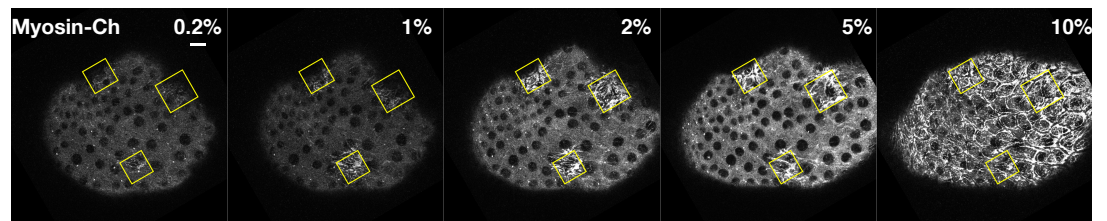

**Figure 1-Figure supplement 2.** Ectopic Rho1 activation is sensitive to light dose.

Larval wing peripodial epithelia expressing the optogenetic components and Myosin-Ch. Rho1 was optogenetically activated in the yellow boxes. Laser power was attenuated to the indicated percent transmittance using an acousto-optical tunable filter. 10% transmittance induces substantial Rho1 activation outside of the activation zone. Lowering the laser transmittance yields decreasing amounts of myosin accumulation. Photoactivation lasted 2 min 20 sec for each % transmittance. Data representative of 4/4 wing imaginal discs. Scale bars are 10 μm.

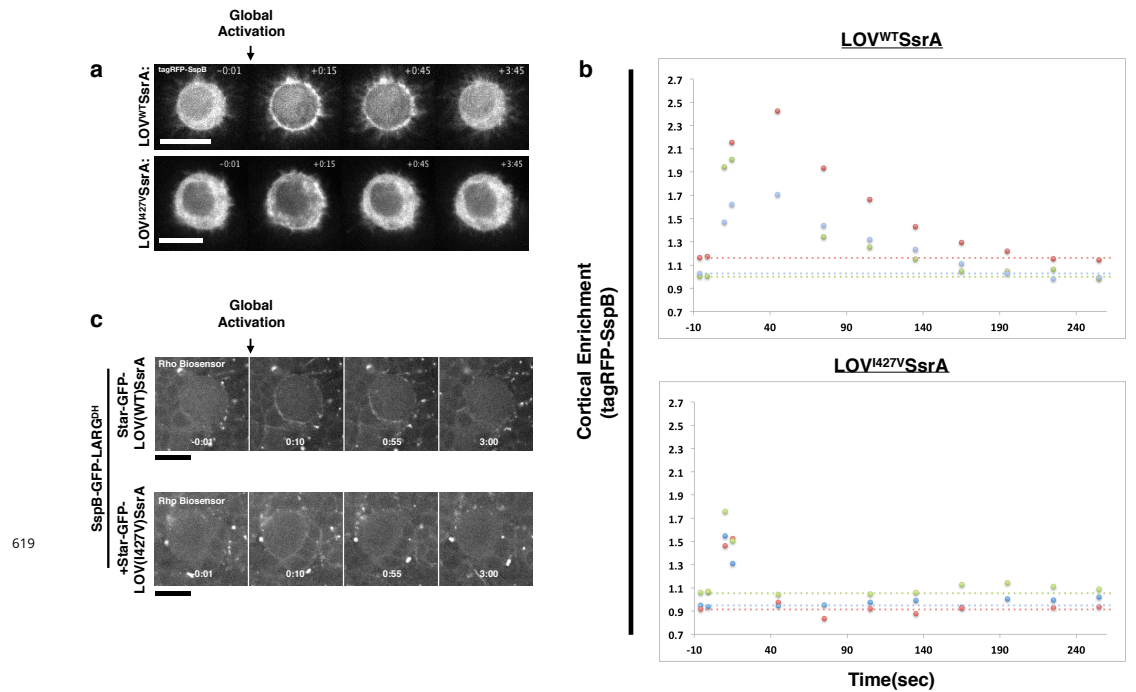

619

**Figure 1-Figure supplement 3.** Inactivation kinetics of the LOV domain dictate the off rate of optogenetic-induced Rho1 activity.

a) S2 cells transiently transfected with recruitable tagRFP-SspB and a membrane localized WT LOV domain (top) or fast-cycling (I427V) LOV domain (bottom). Representative cells are shown before and after global photoactivation. b) Quantification of the cortical enrichment (membrane/cytoplasm) of SspB-tagRFP following global optogenetic Rho1 activation. c) Larval neuroblasts expressing PR-GEF, Rho-biosensor, and WT (top) or fast-cycling (bottom) membrane-localized LOV domain shown before and after global photoactivation. Scale bars are 5  $\mu$ m. Rho-biosensor consists of the Rho binding domain of Anillin, a RhoA effector, fused to mCherry (*Munjal et al., 2015; Piekny and Glotzer, 2008*). Data representative of 16 neuroblasts from 3 brains (top) and 19 neuroblasts from 4 brains (bottom).

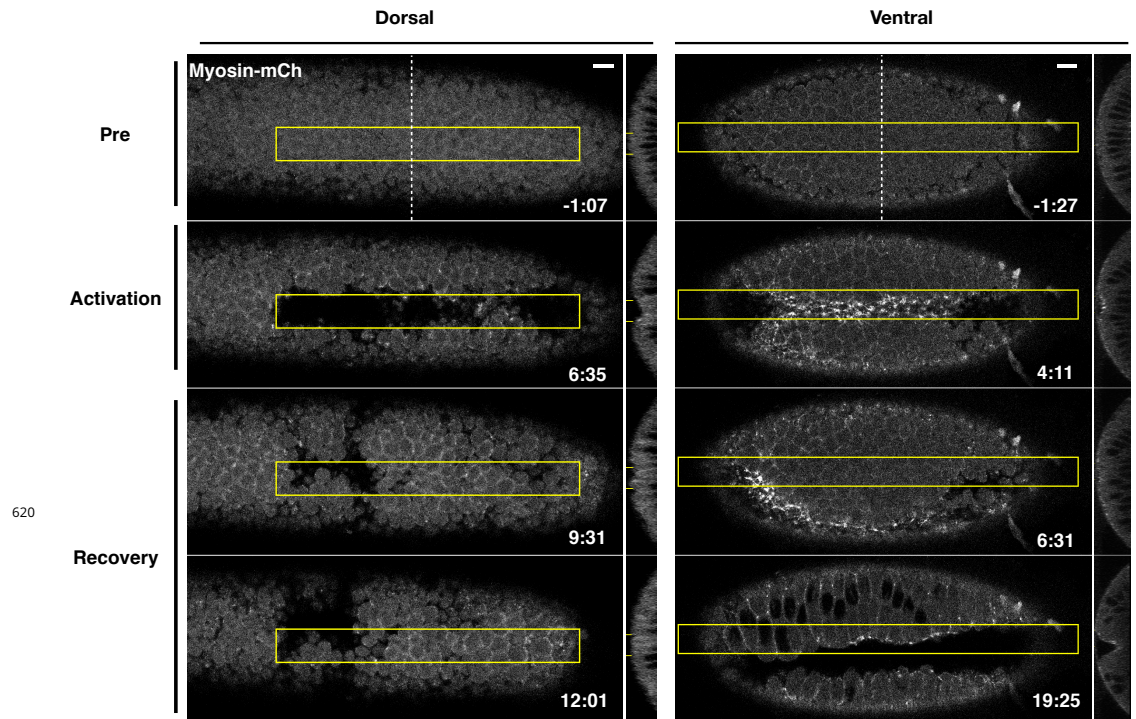

**Figure 2-Figure supplement 1.** Optogenetic-induced invaginations revert following cessation of Rho1 activation.

Dorsal (left) or ventral (right) epithelium of *Drosophila* embryos expressing the optogenetic components and Myosin-Ch before, during, and after local Rho1 activation within the yellow boxes. Note that some cells in the dorsal epithelium remain invaginated after the recovery period. These sustained pockets of invagination are sometimes seen where the dorsal transverse folds form. Data representative of 5/5 dorsal and 4/4 ventral embryos. Time zero indicates the first pulse of blue light activation. Scale bars are 10  $\mu$ m.

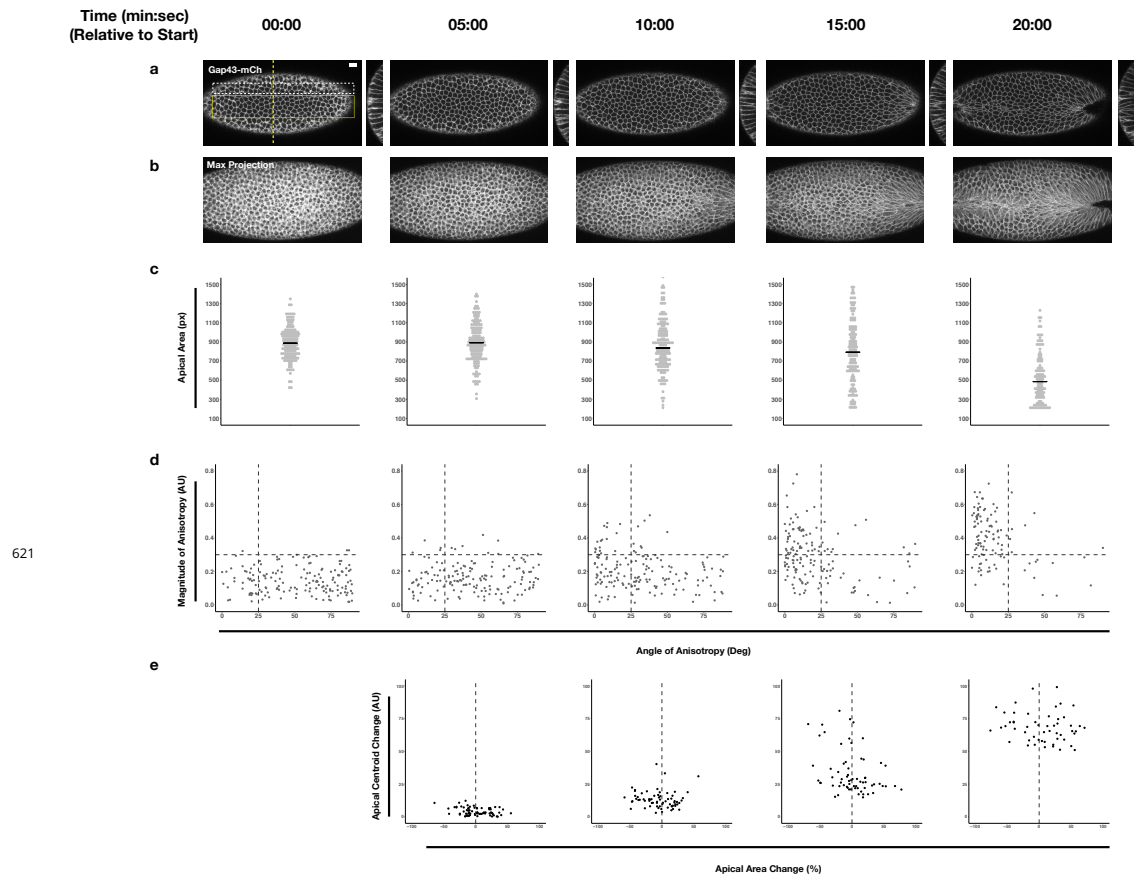

621

**Figure 3-Figure supplement 1.** Quantification of endogenous ventral furrow formation.

a-b) Single plane (a) and maximum projection (b) images of a non-activated embryo expressing the optogenetic components. c-d) Plot of apical area (c) or anisotropy (d) of cells in the endogenous ventral furrow (yellow box in a) at indicated time points. Black lines in (c) represent median. e) Plot of centroid change, relative to time 00:00, along the Y axis for cells neighboring the ventral furrow (white box in a). Data representative of 3/3 embryos. Scale bars are 10  $\mu\text{m}$ .

622

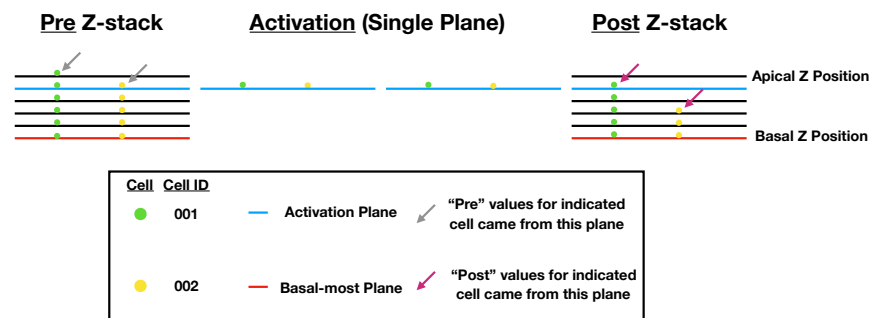

**Figure 3-Figure supplement 2.** Schematic of data collection and analysis for local activation experiments.

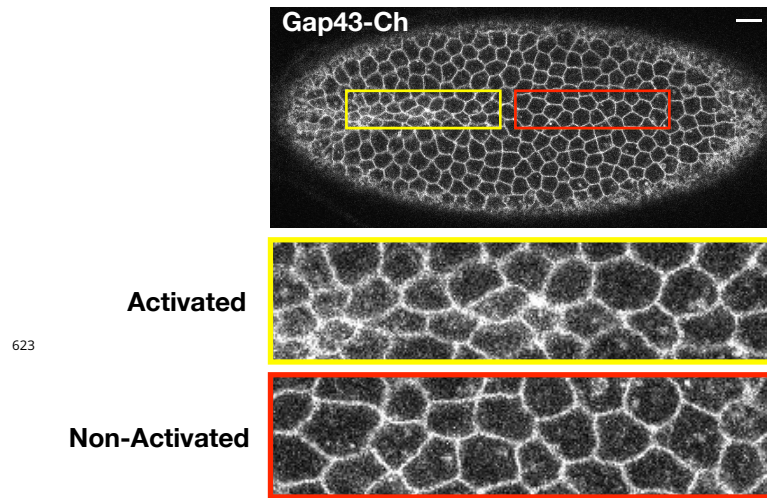

**Figure 3-Figure supplement 3.** Optogenetic activation of Rho1 induces precocious cell shape changes in the ventral epithelium.

Ventral surface of an embryo expressing the optogenetic components and Gap43-Ch. Rho1 was activated within the yellow box. Zoomed images of activated (yellow) and non-activated (red) cells are shown. Data representative of 4/4 embryos. Scale bars are 10  $\mu$ m.

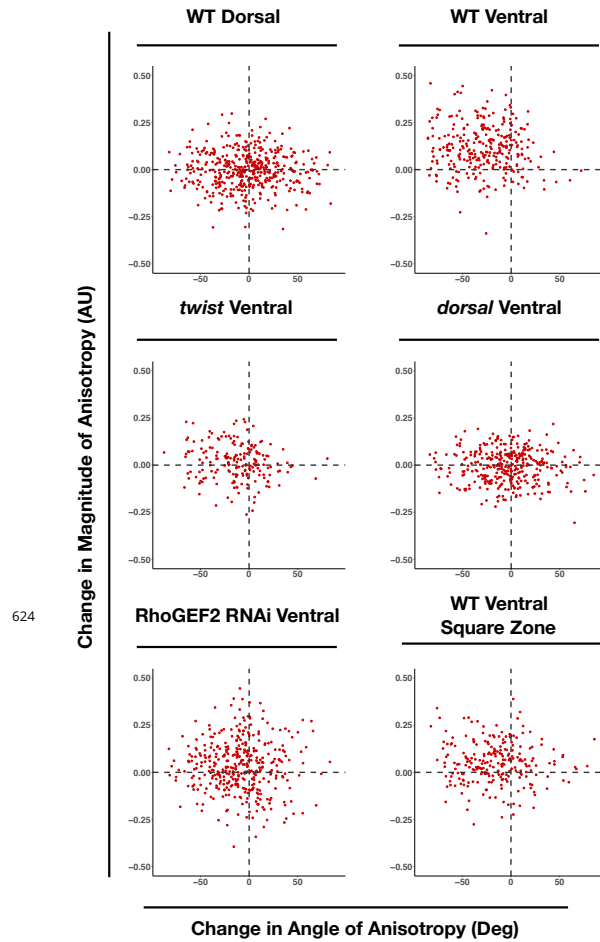

**Figure 3–Figure supplement 4.** WT ventral cells exhibit large changes in the magnitude and alignment of anisotropy in response to Rho1 activation.

X and Y axes show the changes in anisotropy angle (X) and magnitude (Y) for each cell over the course of optogenetic activation. Angle change was calculated as end angle (in degrees) minus start angle (in degrees). Magnitude change was calculated as end magnitude minus start magnitude. 444 cells from 4 wildtype dorsally oriented, 288 cells from 4 wildtype ventrally oriented, 343 cells from 4 *dorsal* embryos, 189 cells from 3 *twist* embryos, 375 cells from 5 RhoGEF2 depleted embryos, and 239 cells from 5 square zone embryos were analyzed.
